# Supplementary material for: Bifunctional N-heterocyclic carbene ligands for Cu-catalyzed direct C–H carboxylation with CO2
Source: Royal Society of Chemistry journal article supplement (doi:10.1039/c7ra11414a), 2017-01-01
Supplement: c7ra11414a1.pdf [file c7ra11414a1.pdf]

## Supporting information

# Bifunctional N-heterocyclic carbene ligands for Cu-catalyzed direct C-H carboxylation with CO<sub>2</sub>

Da-Ae Park,<sup>a</sup> Ji Yeon Ryu,<sup>b</sup> Junseong Lee<sup>b</sup> and Sukwon Hong<sup>a,c,\*</sup>

*<sup>a</sup>Department of Chemistry, Gwangju Institute of Science and Technology, 123 Cheomdan-gwagi-ro, Buk-gu, Gwangju 61005, Republic of Korea*

*<sup>b</sup>Department of Chemistry, Chonnam National University, 77 Yongbong-ro, Buk-gu, Gwangju 61186, Republic of Korea*

*<sup>c</sup>School of Materials Science and Engineering, Gwangju Institute of Science and Technology, 123 Cheomdan-gwagi-ro, Buk-gu, Gwangju 61005, Republic of Korea*

## Contents

**1. <sup>1</sup>H and <sup>13</sup>C NMR Spectra for Ligands and Catalysts**

**2. <sup>1</sup>H and <sup>13</sup>C NMR Spectra for Other Compounds**

**3. X-ray Analysis for Compound 5a and 5g**

# 1. <sup>1</sup>H and <sup>13</sup>C NMR Spectra for Ligands and Catalysts

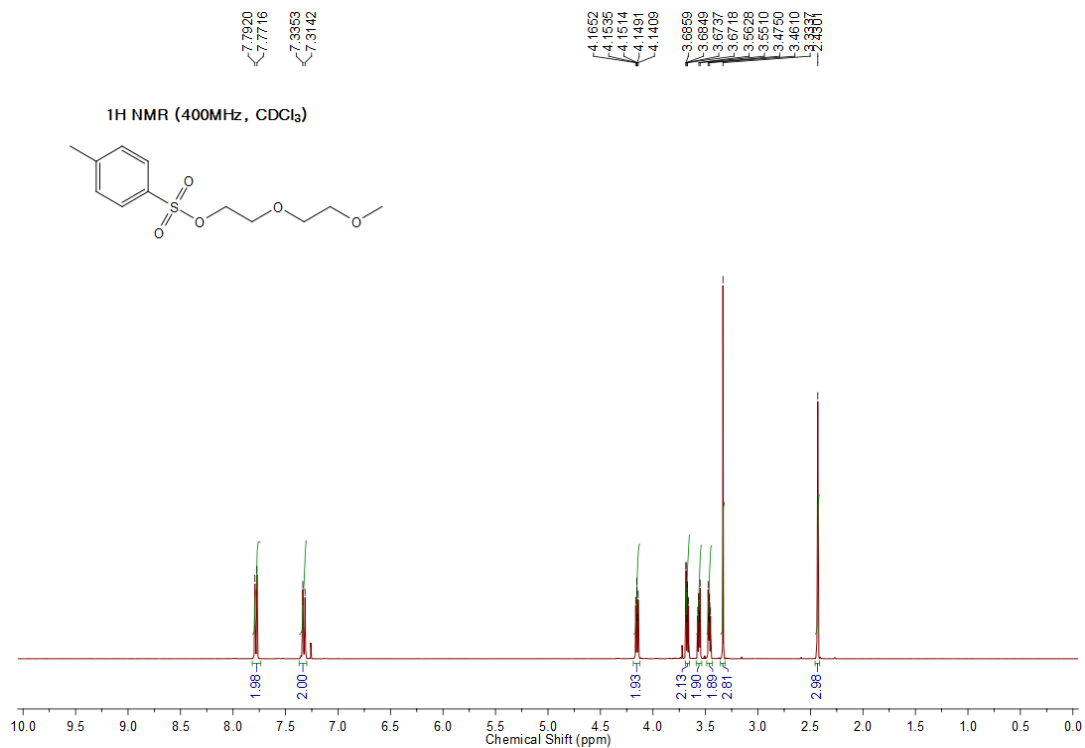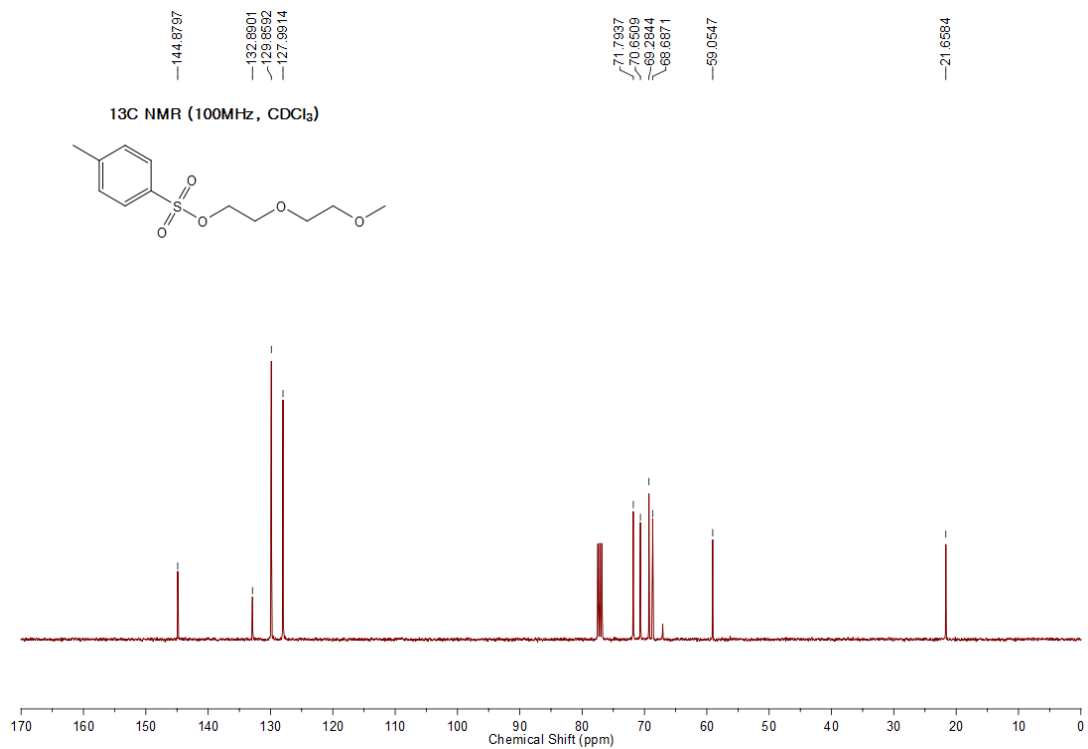

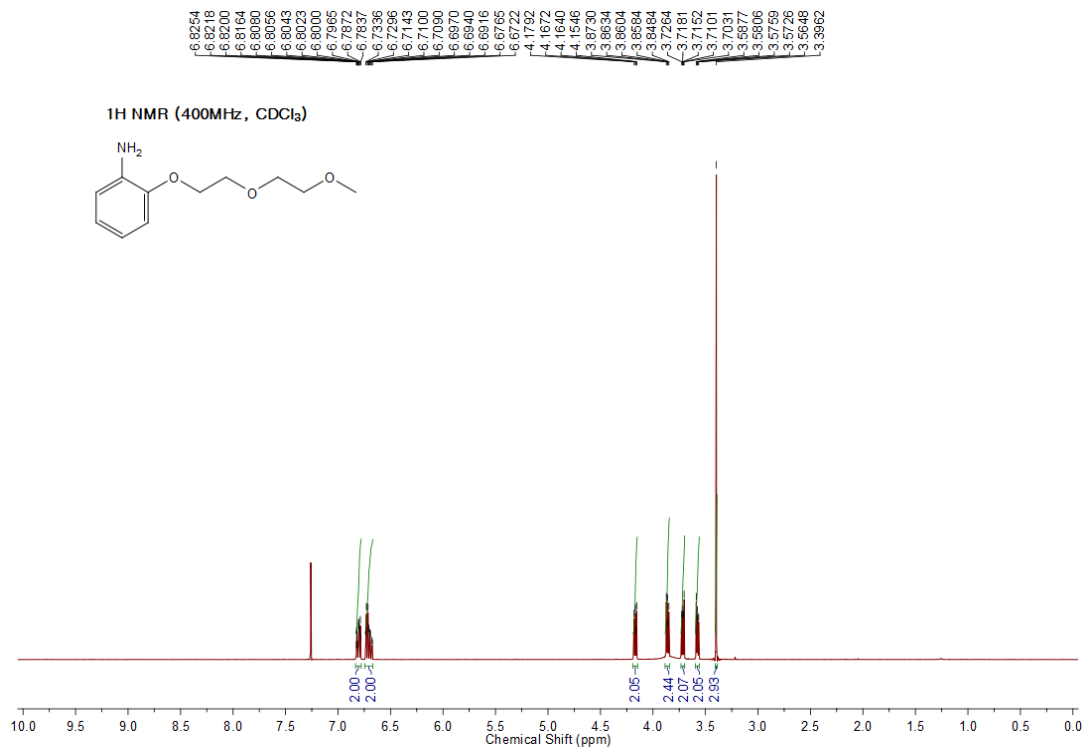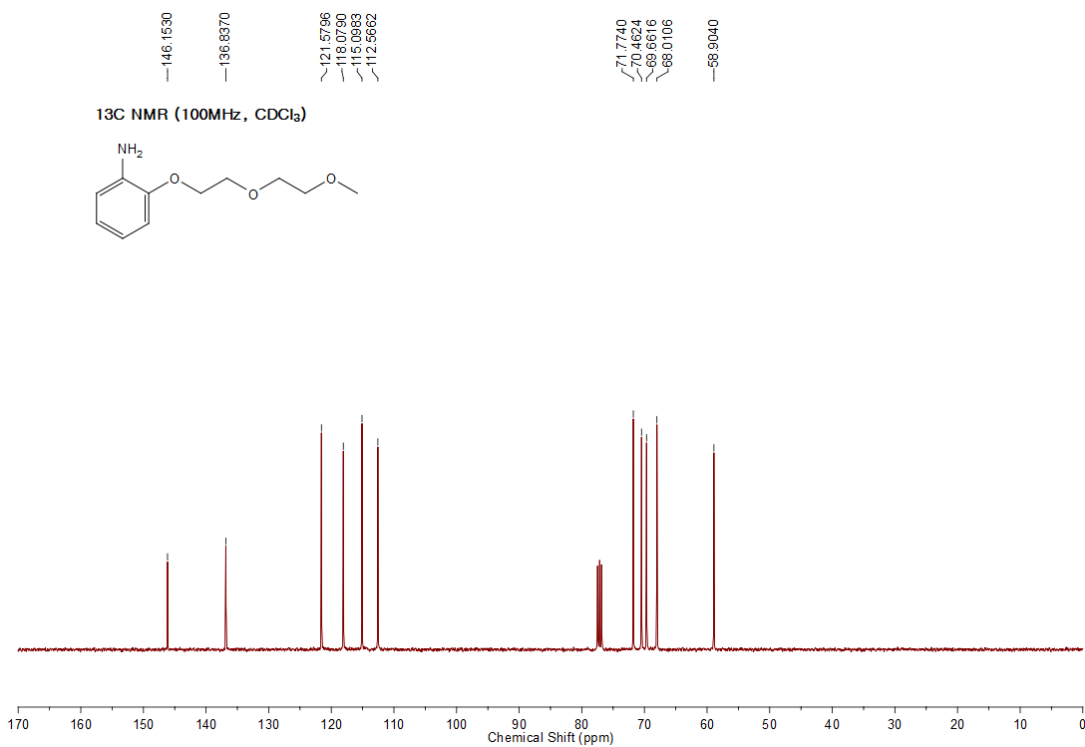

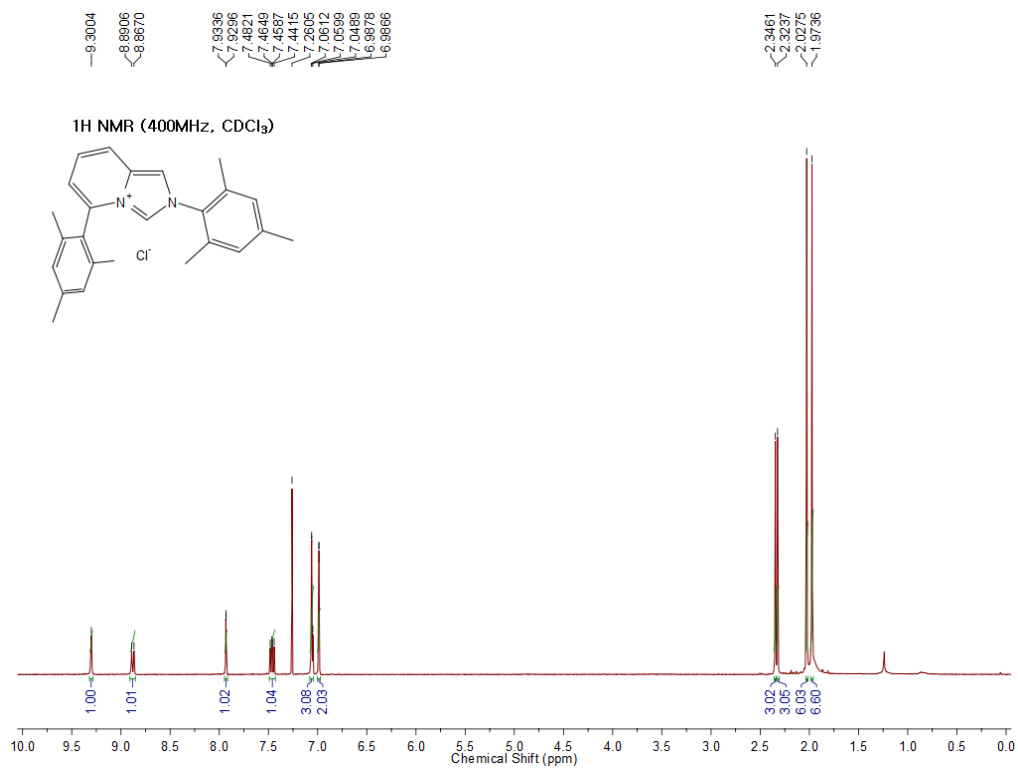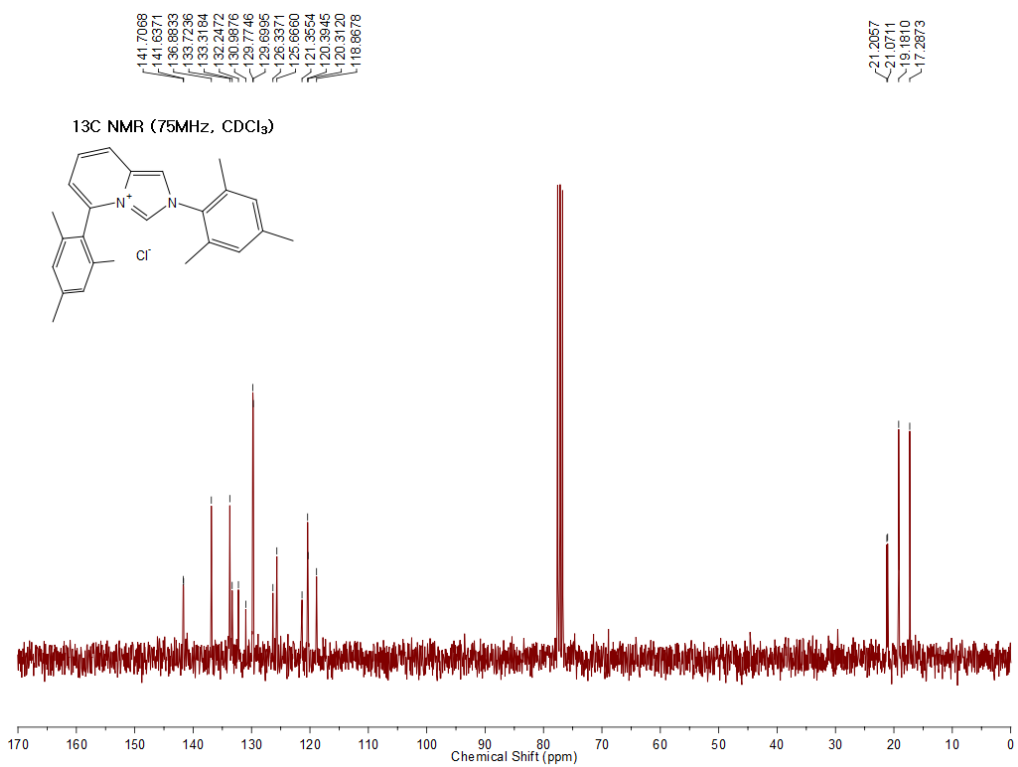

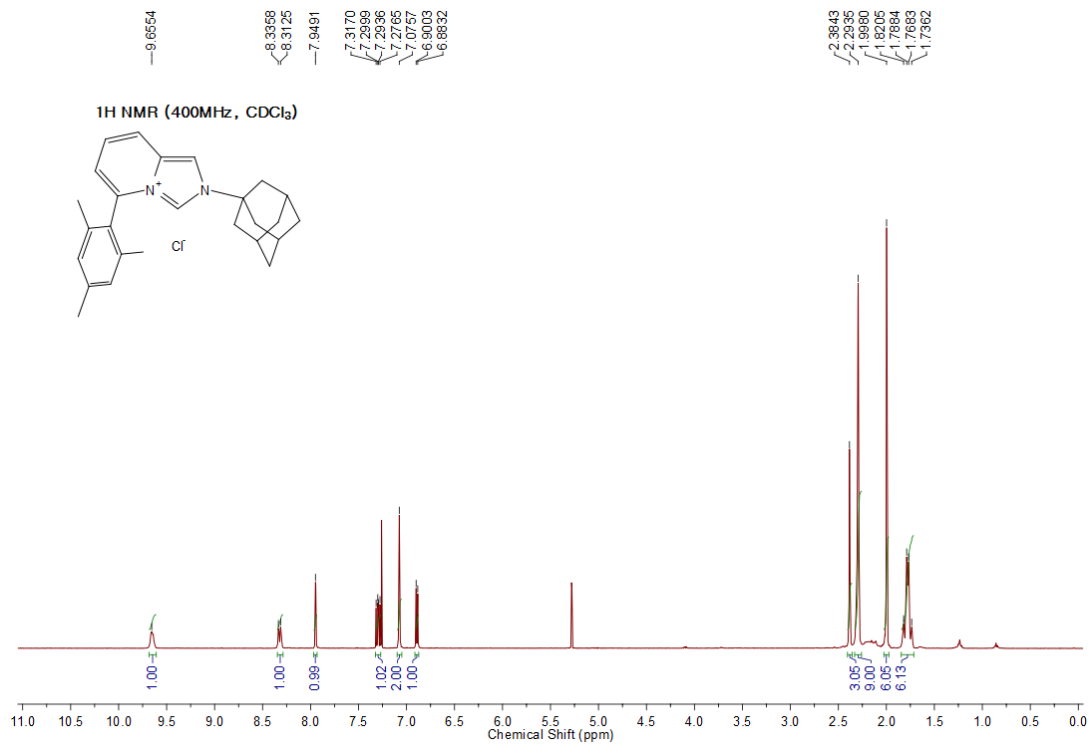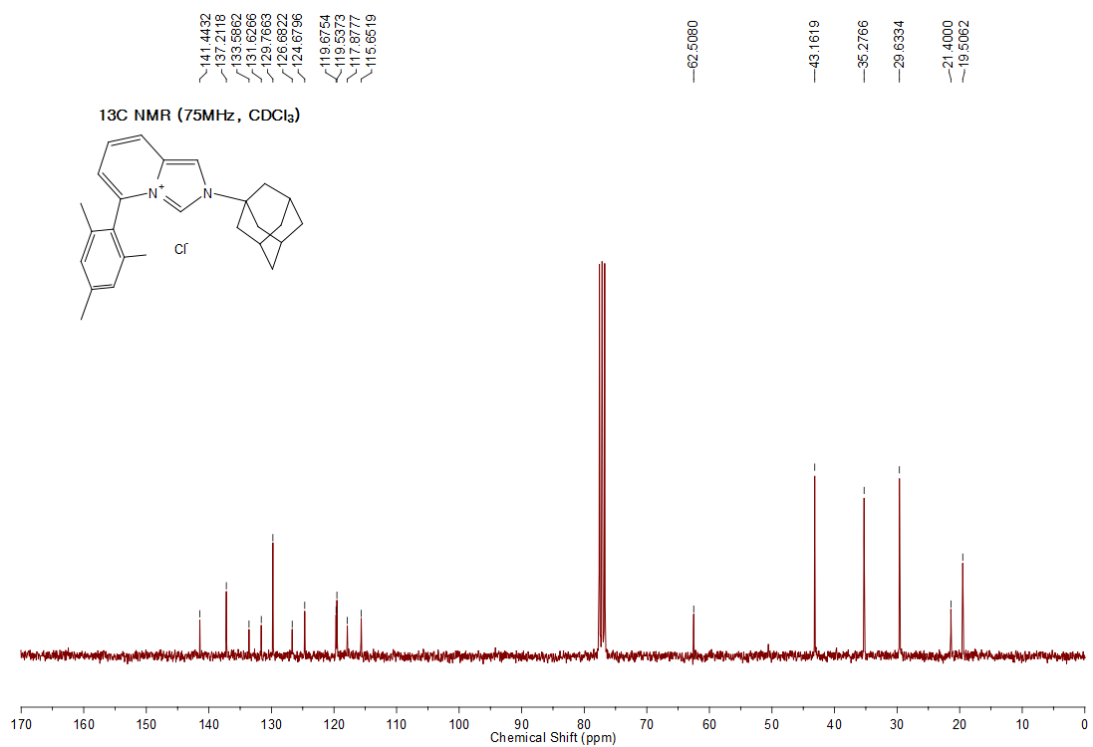

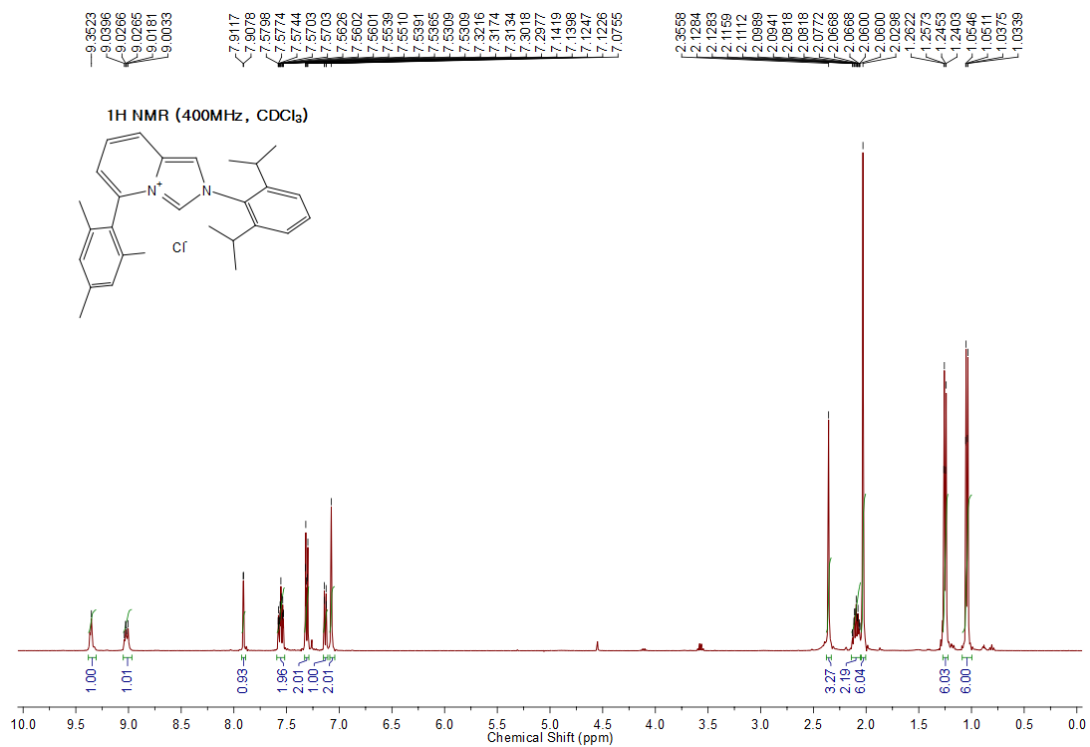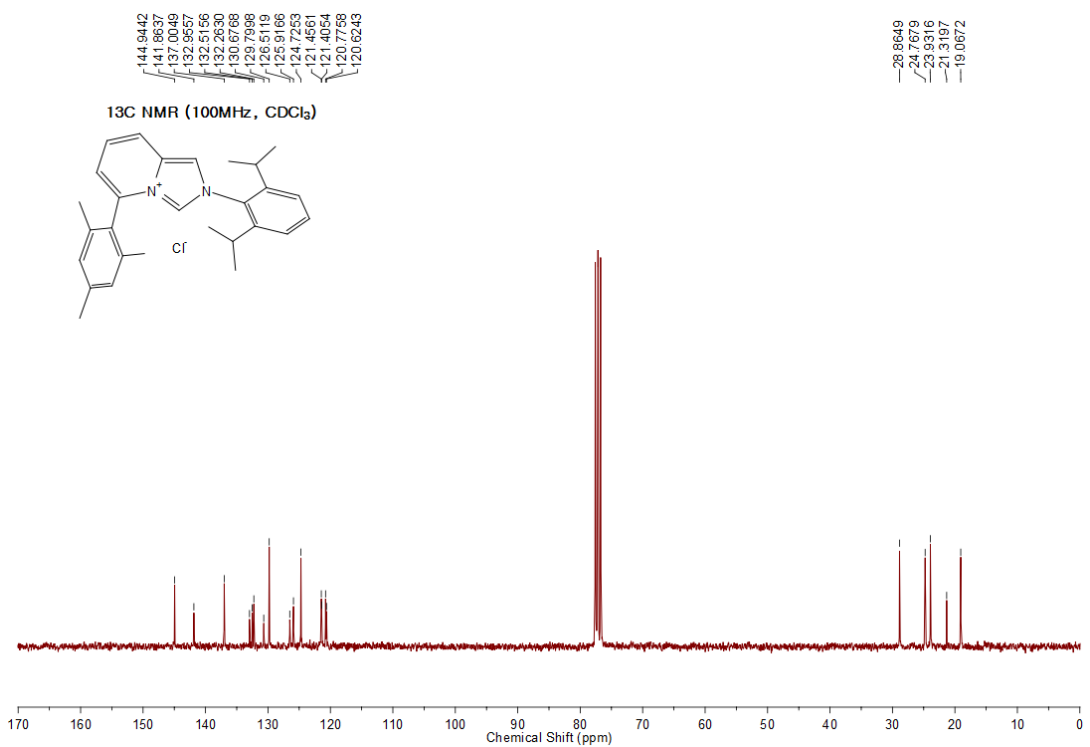

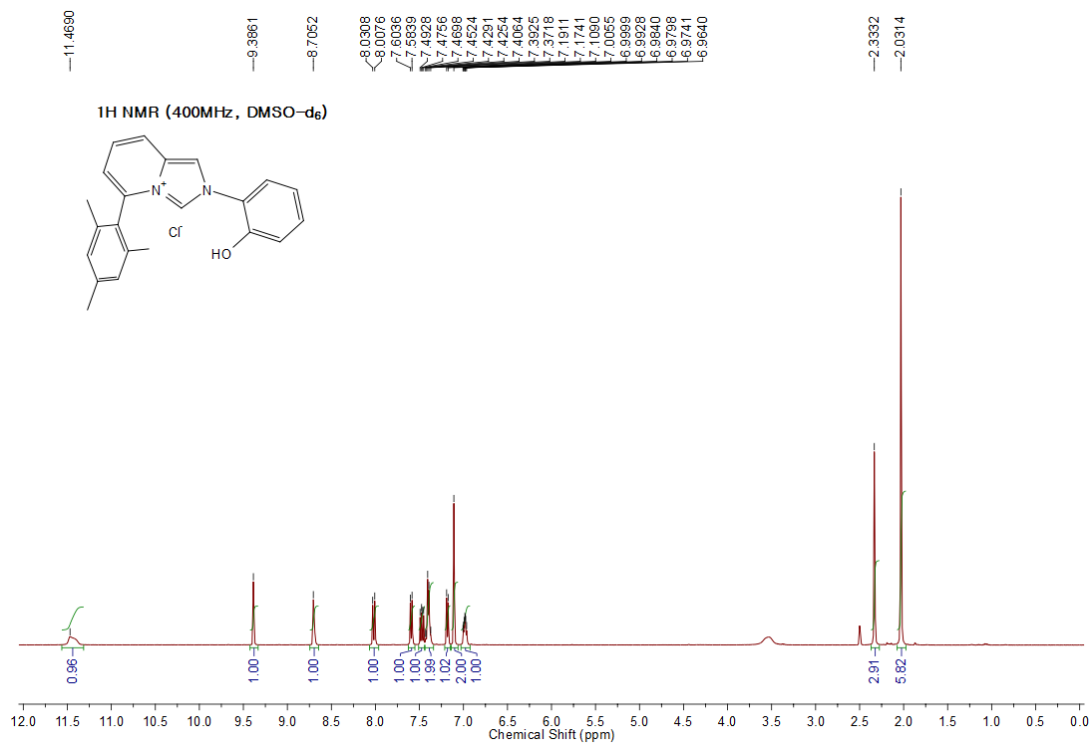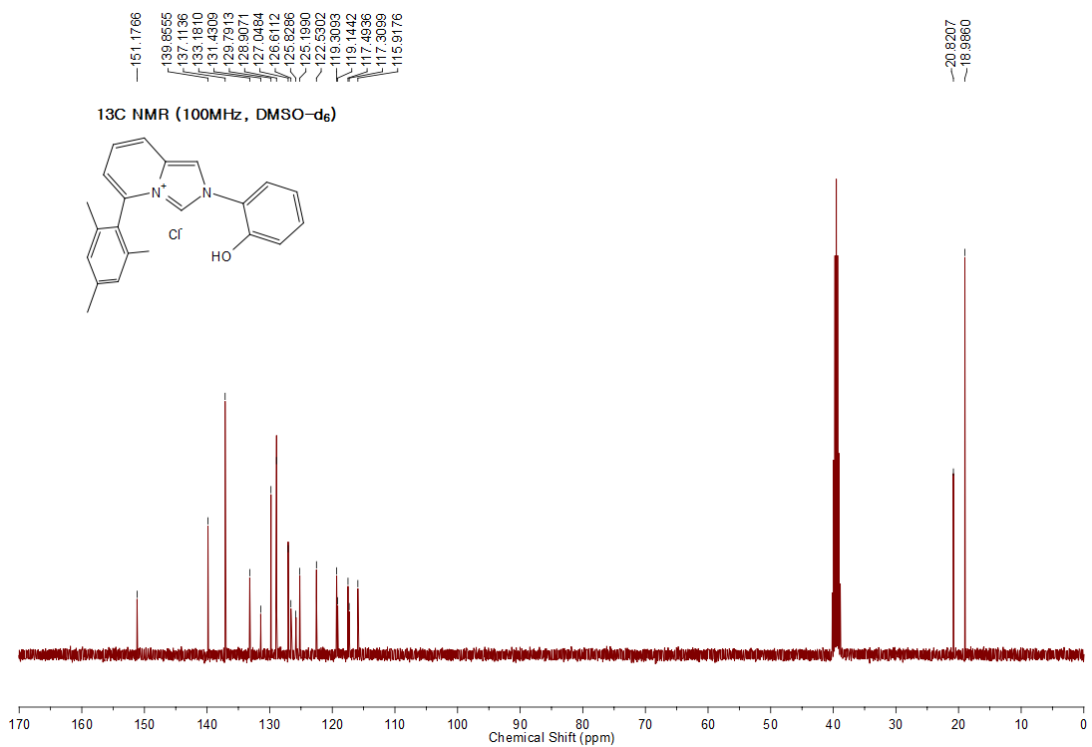

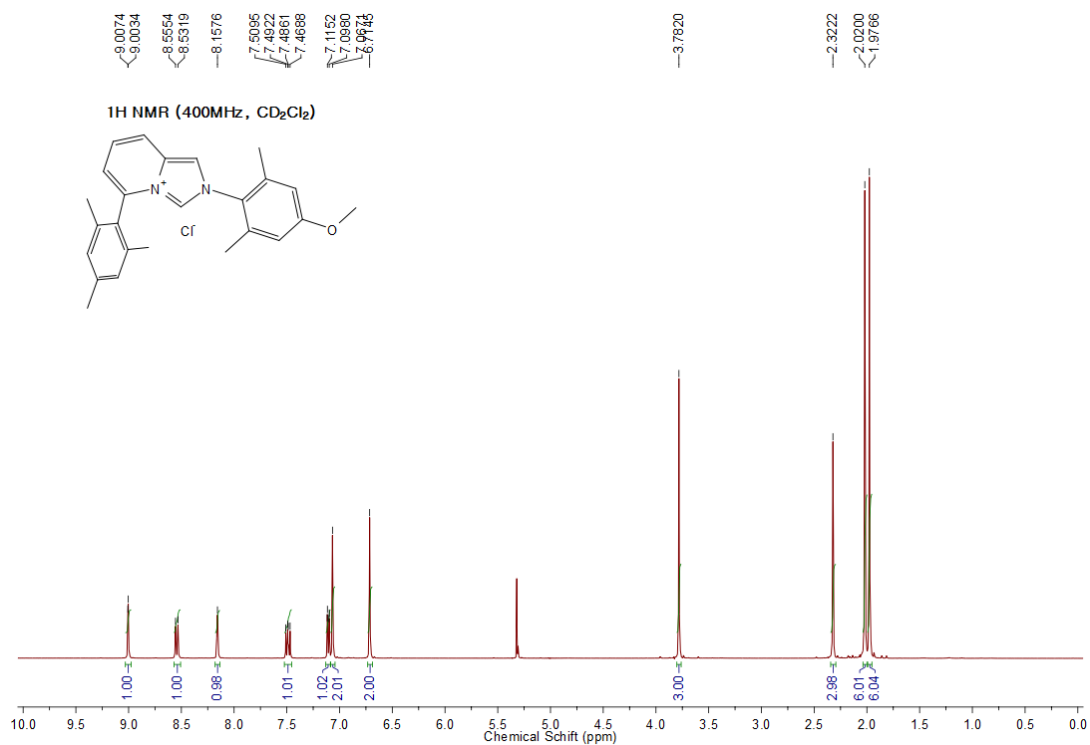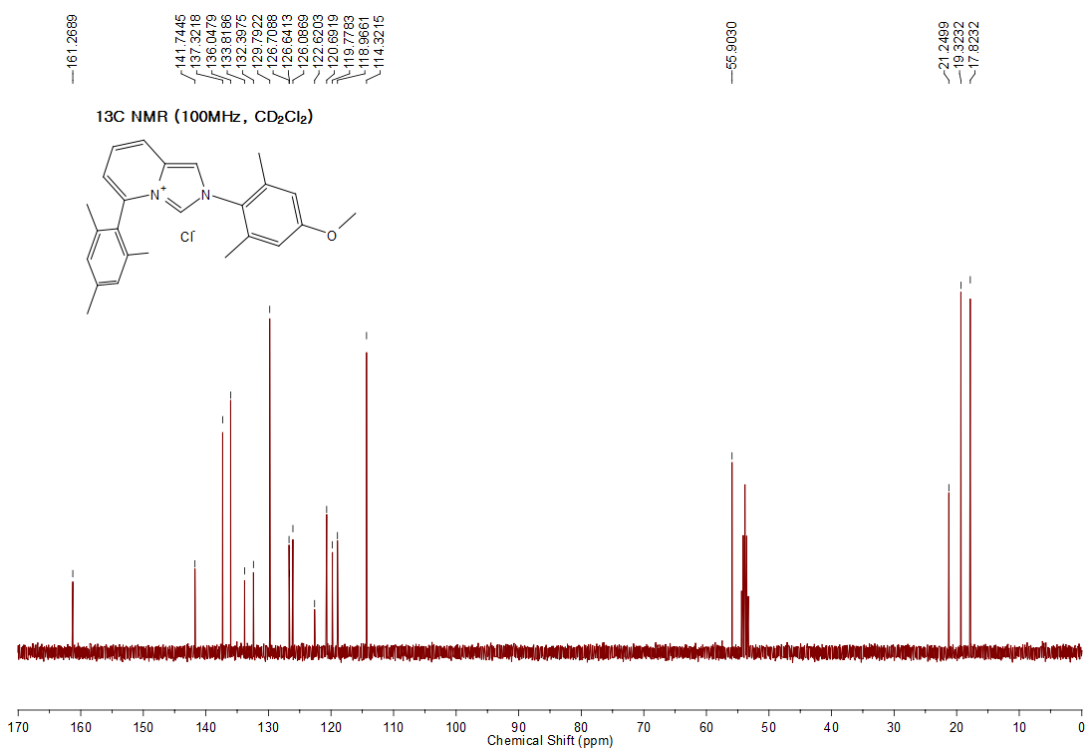



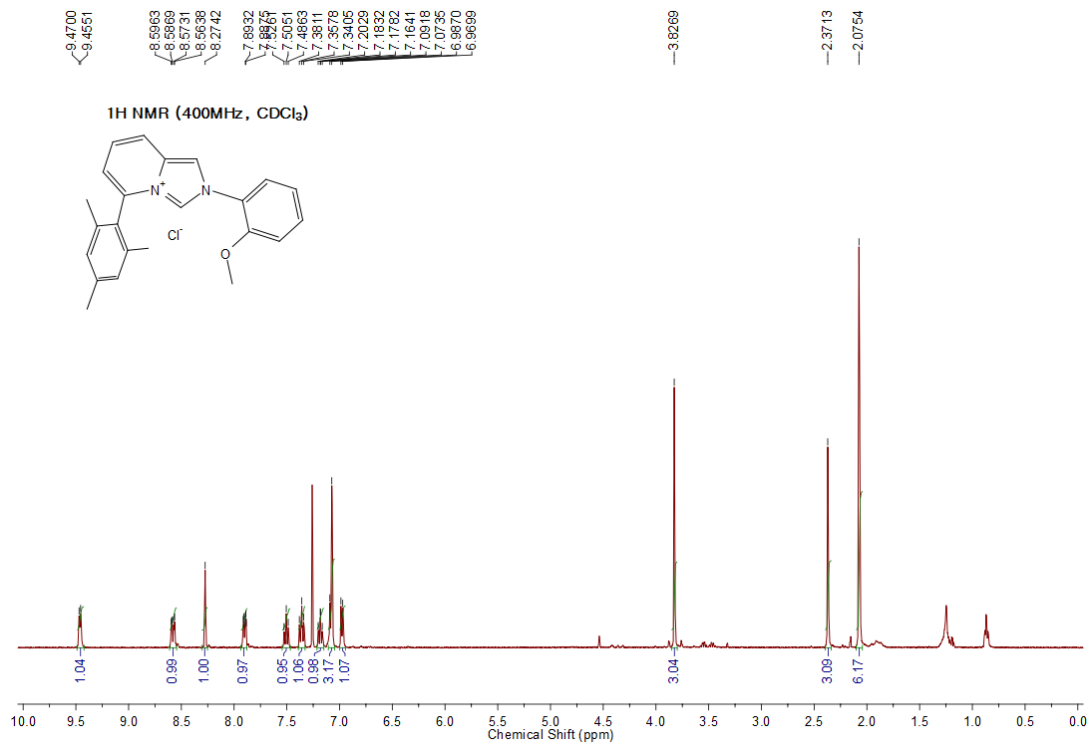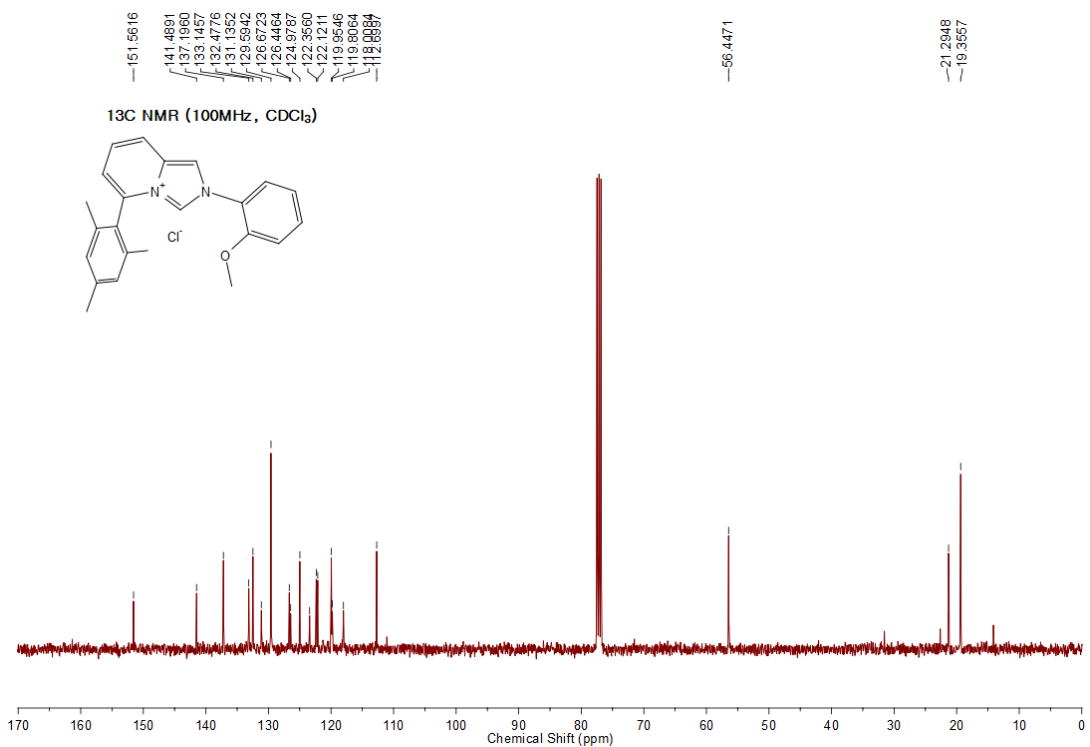

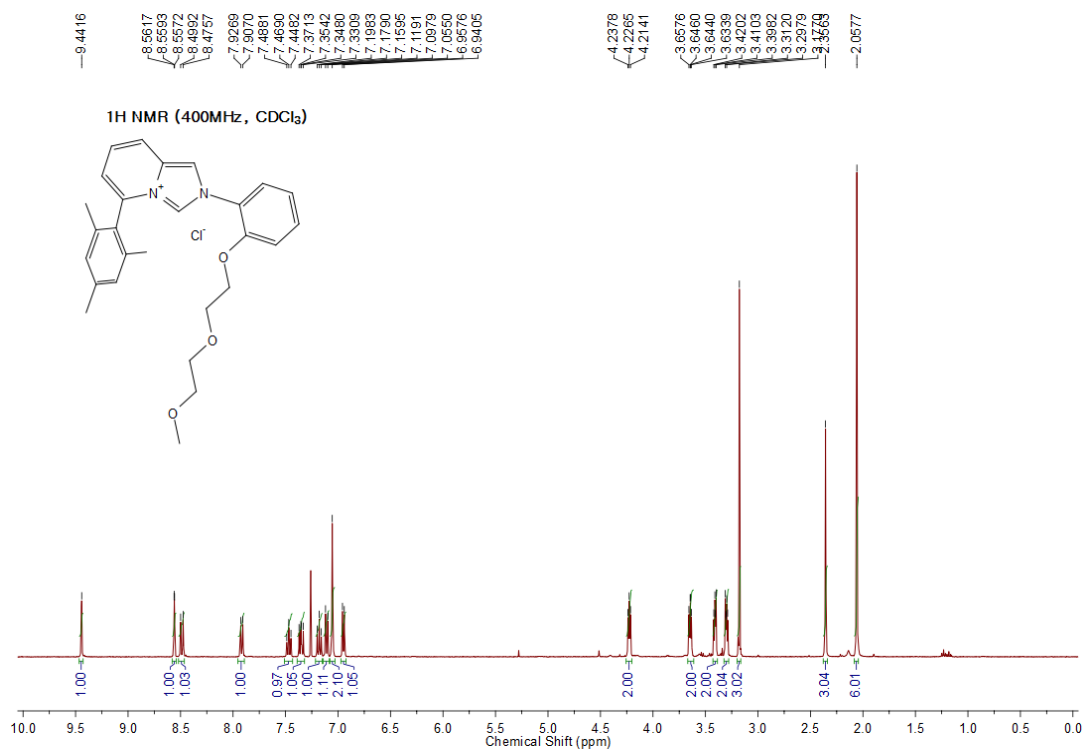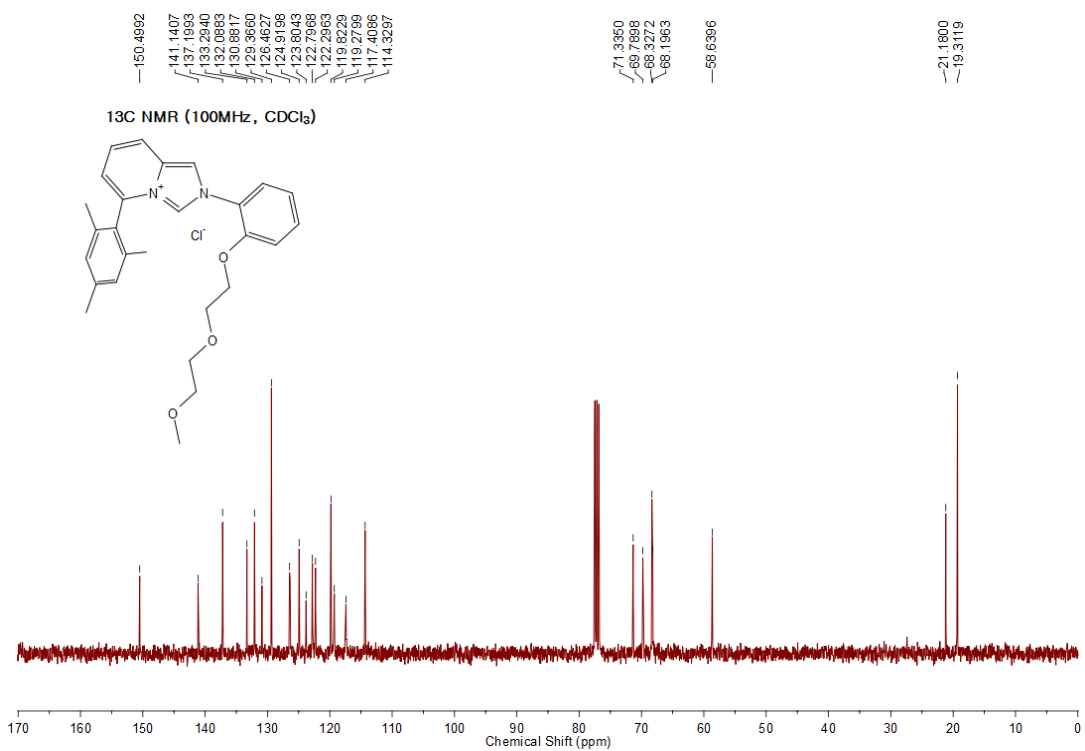

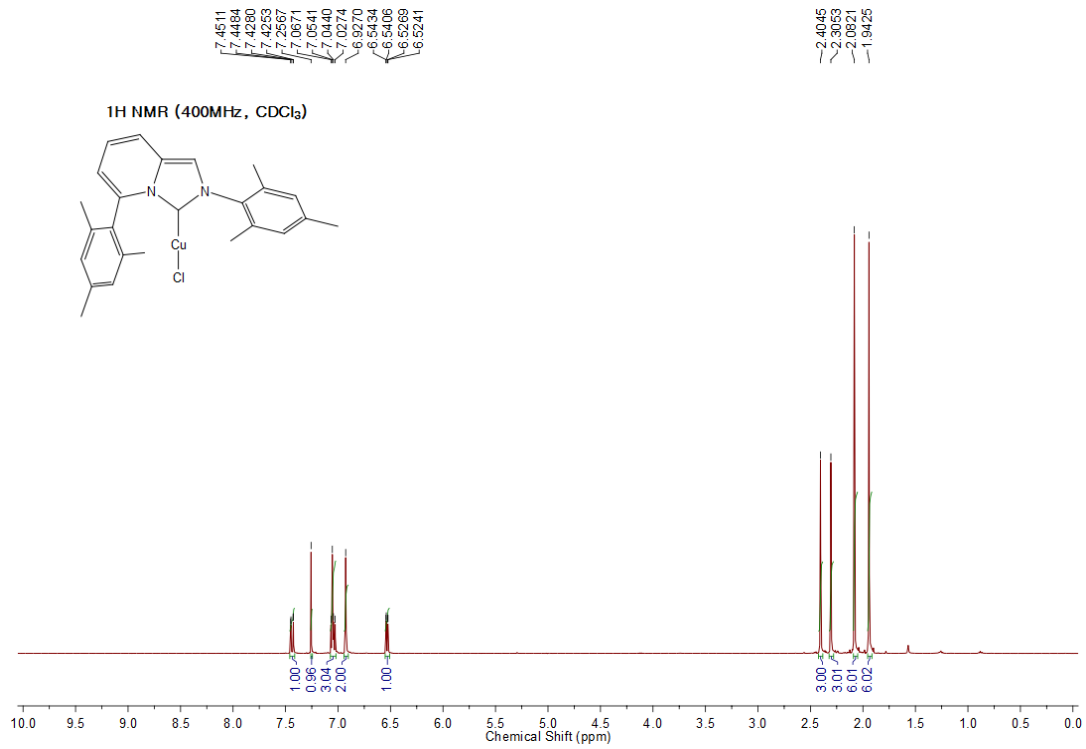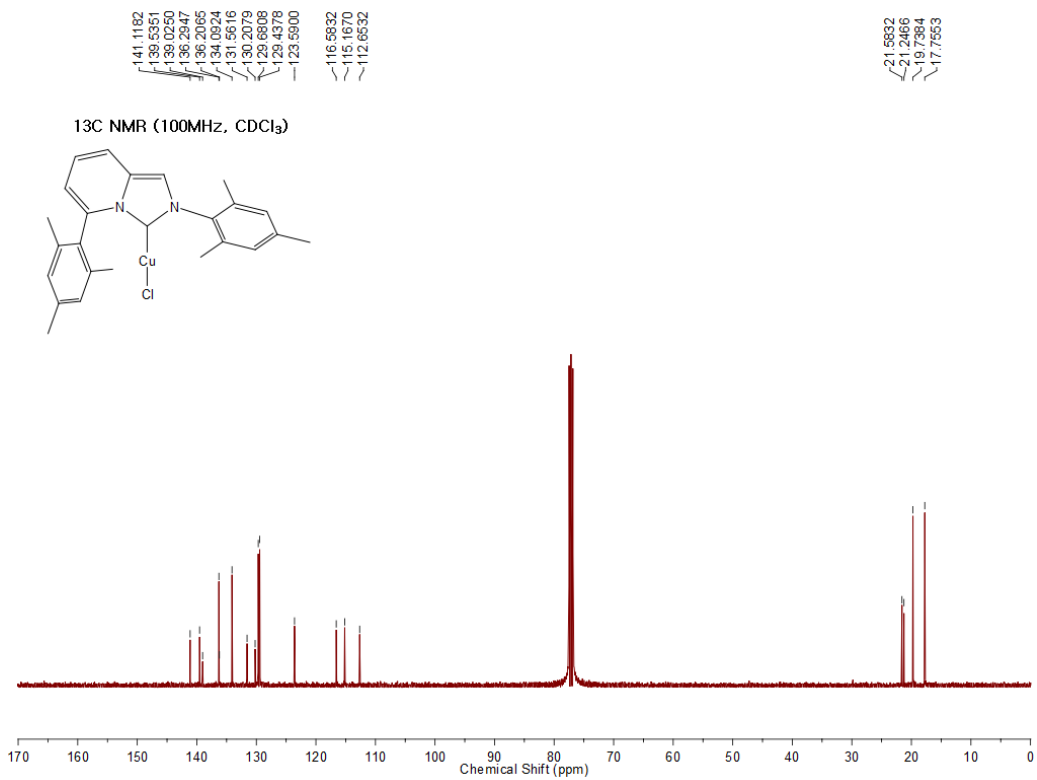

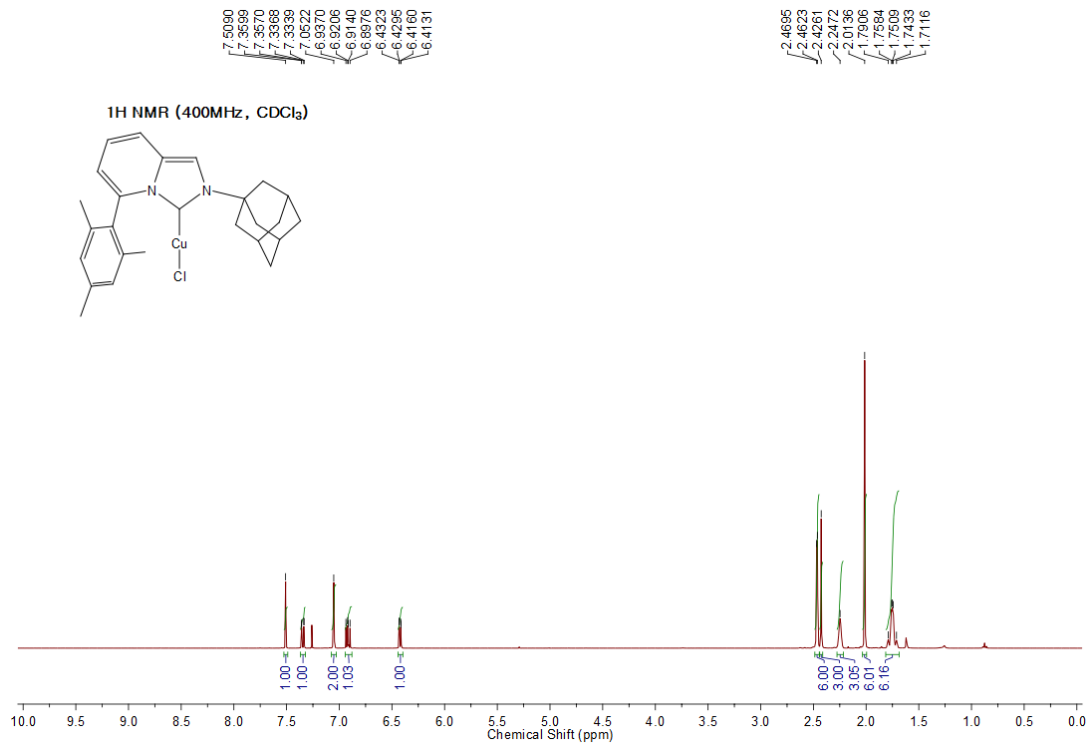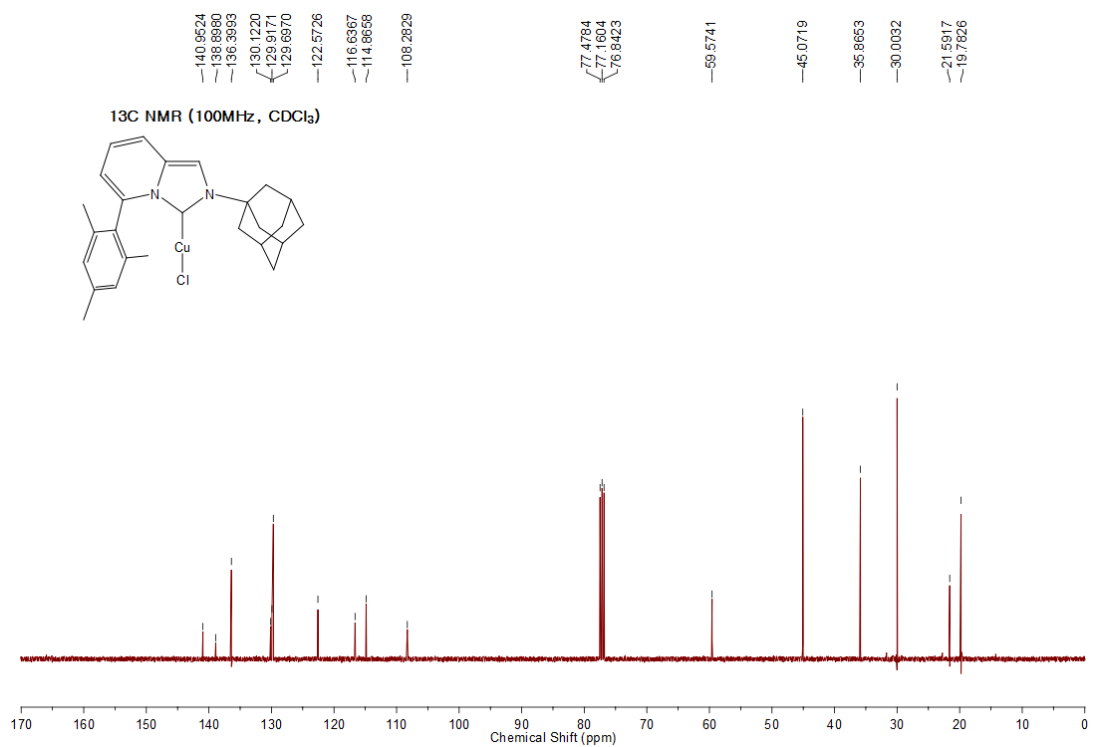

**<sup>1</sup>H NMR (300MHz, CDCl<sub>3</sub>)**

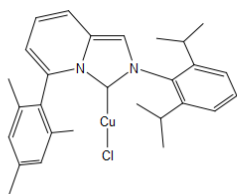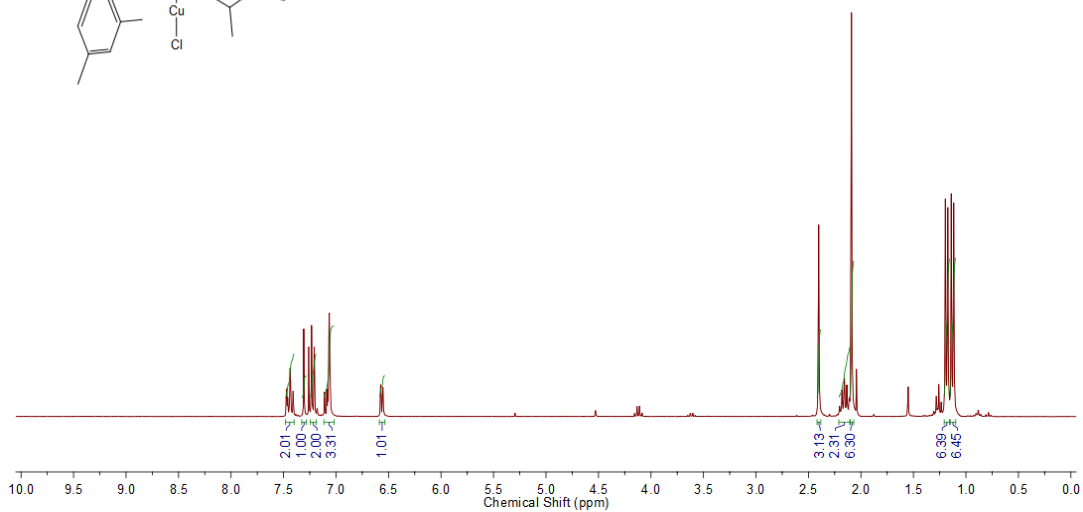

**<sup>13</sup>C NMR (100MHz, CDCl<sub>3</sub>)**

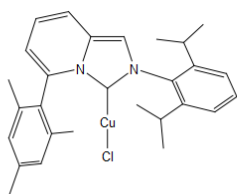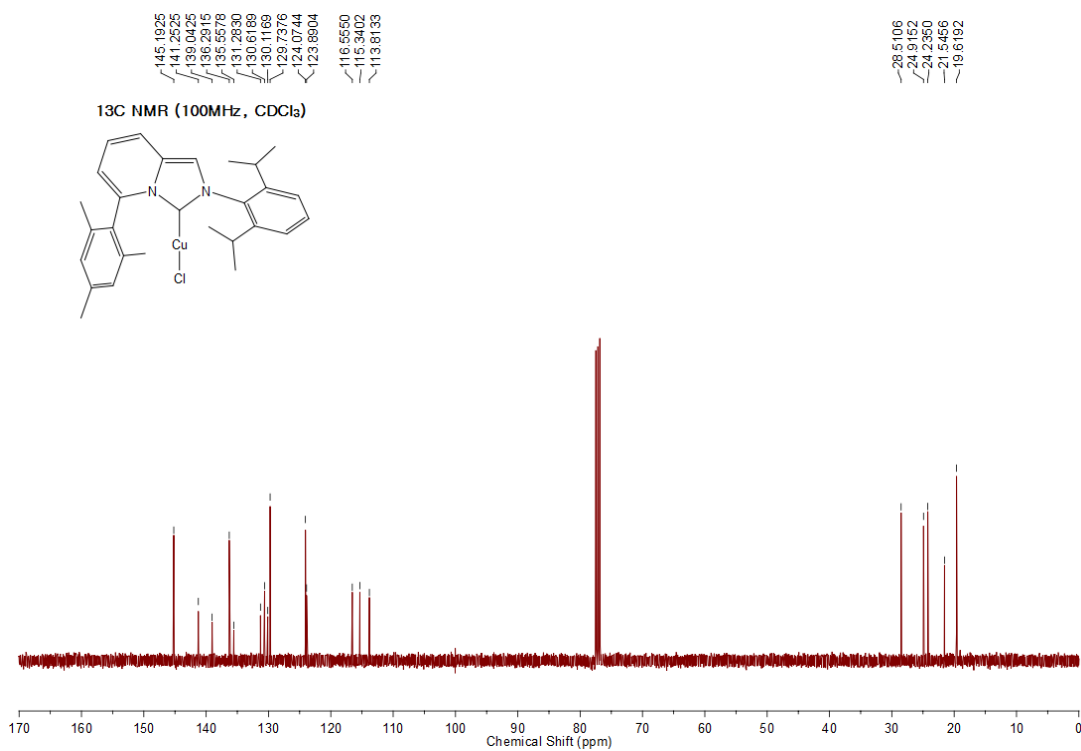

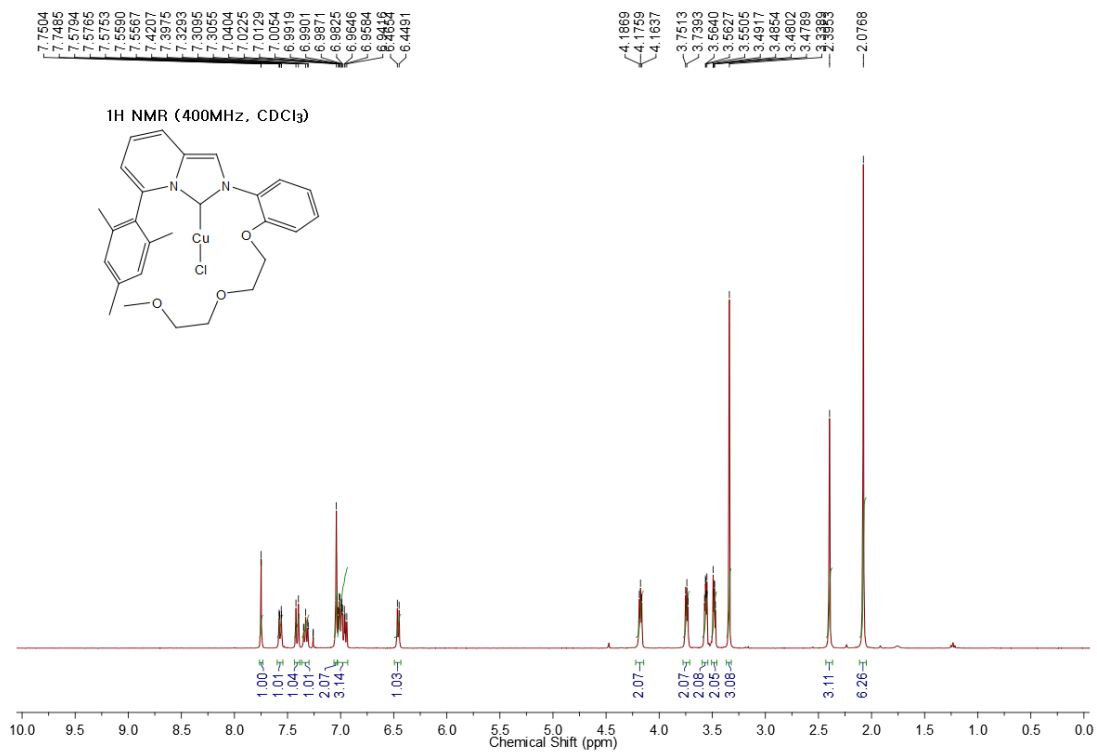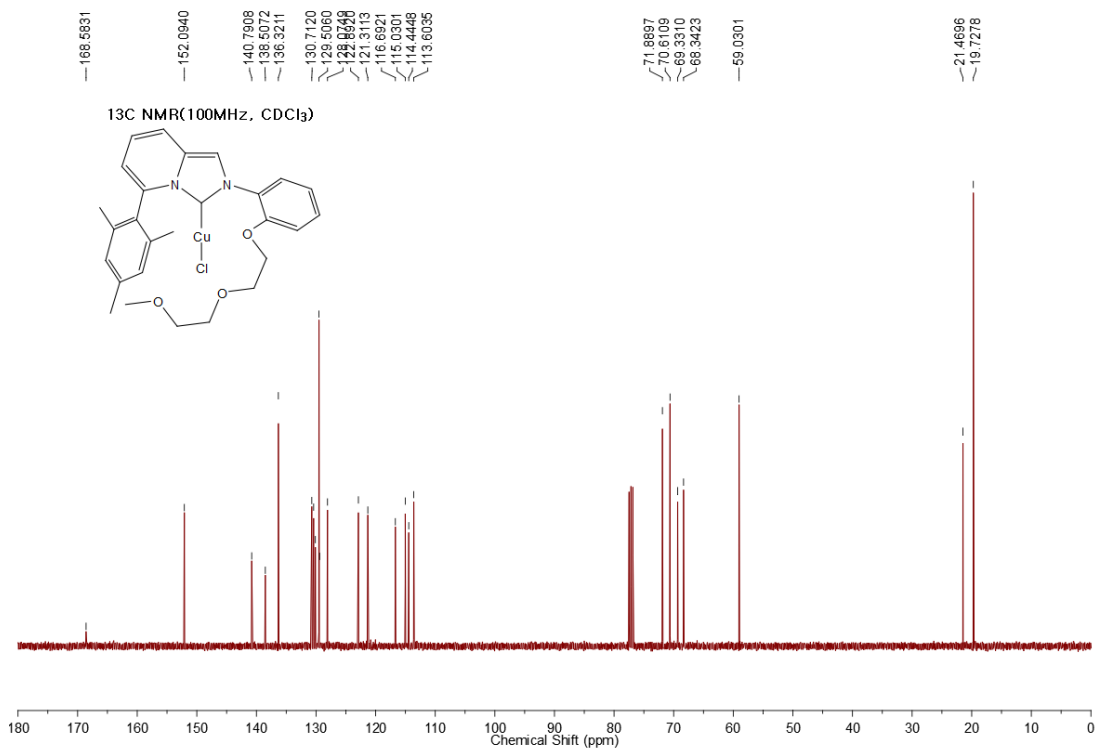

## 2. <sup>1</sup>H and <sup>13</sup>C NMR Spectra for Other Compounds

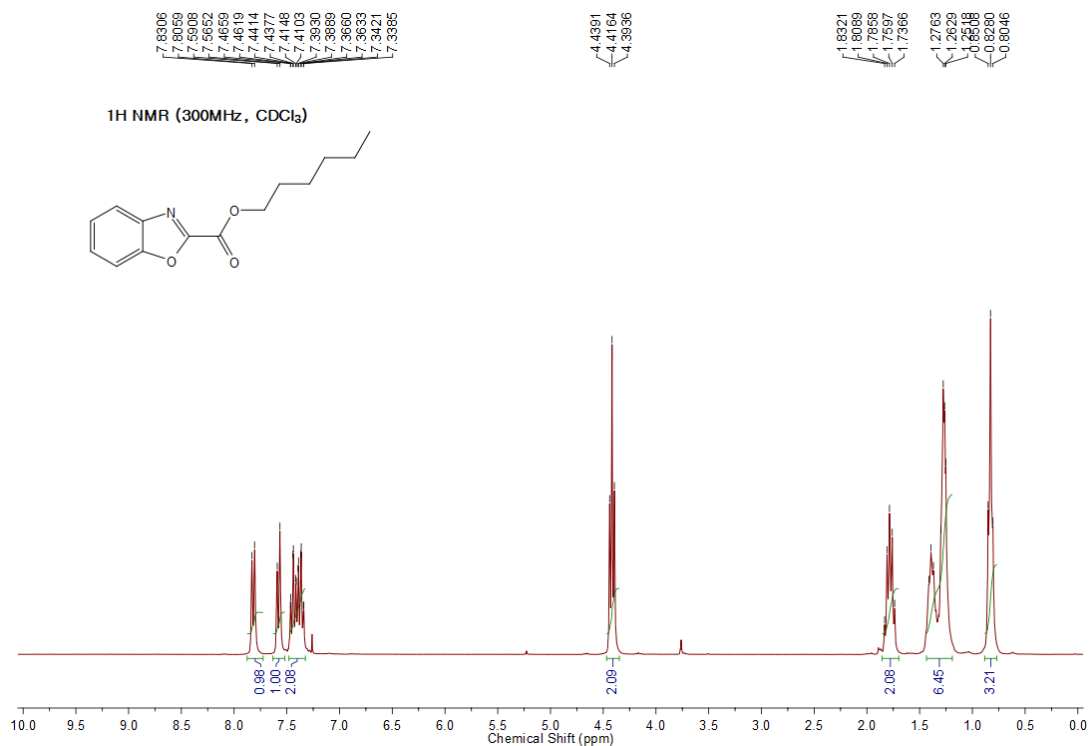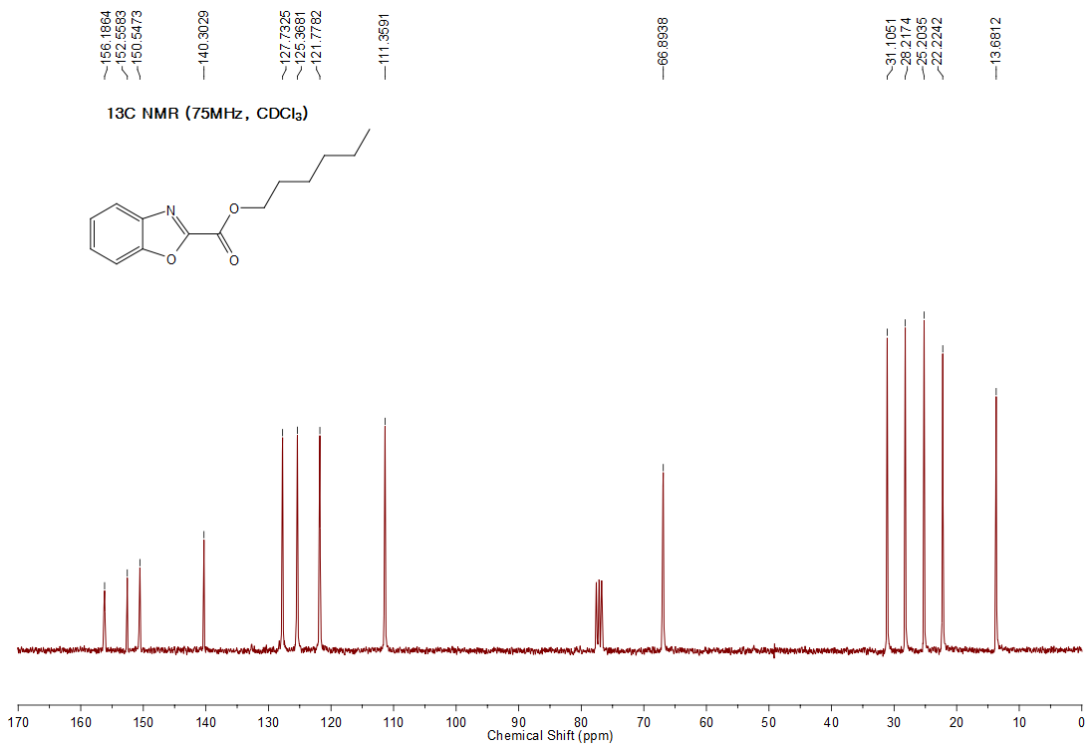

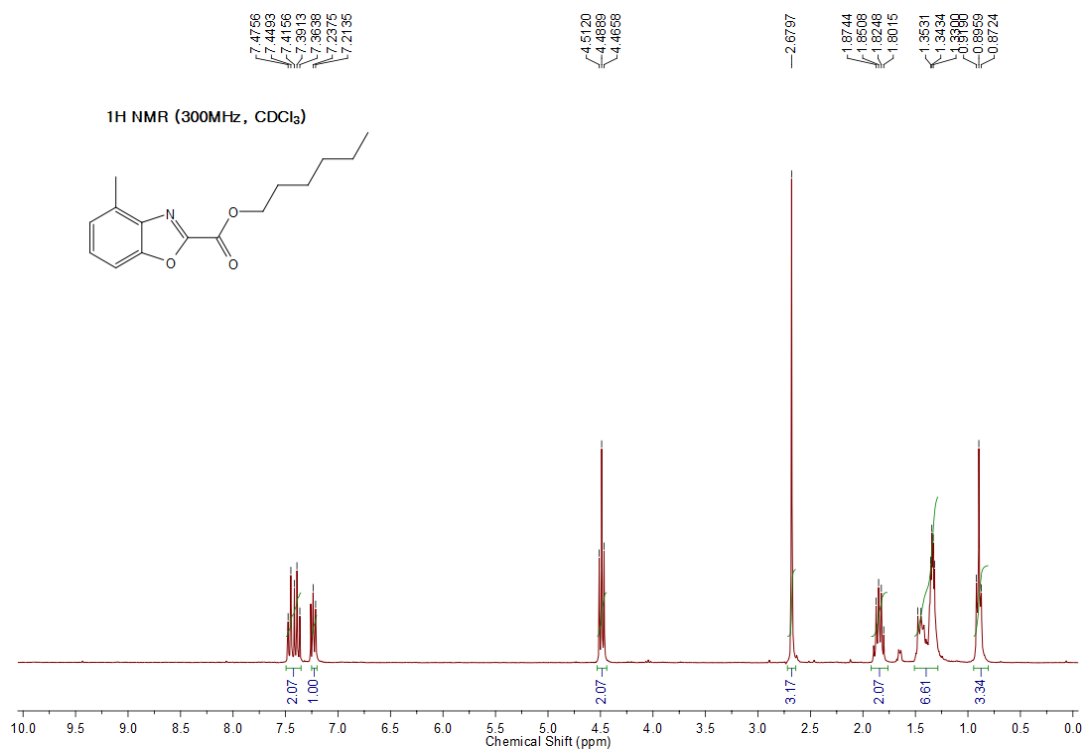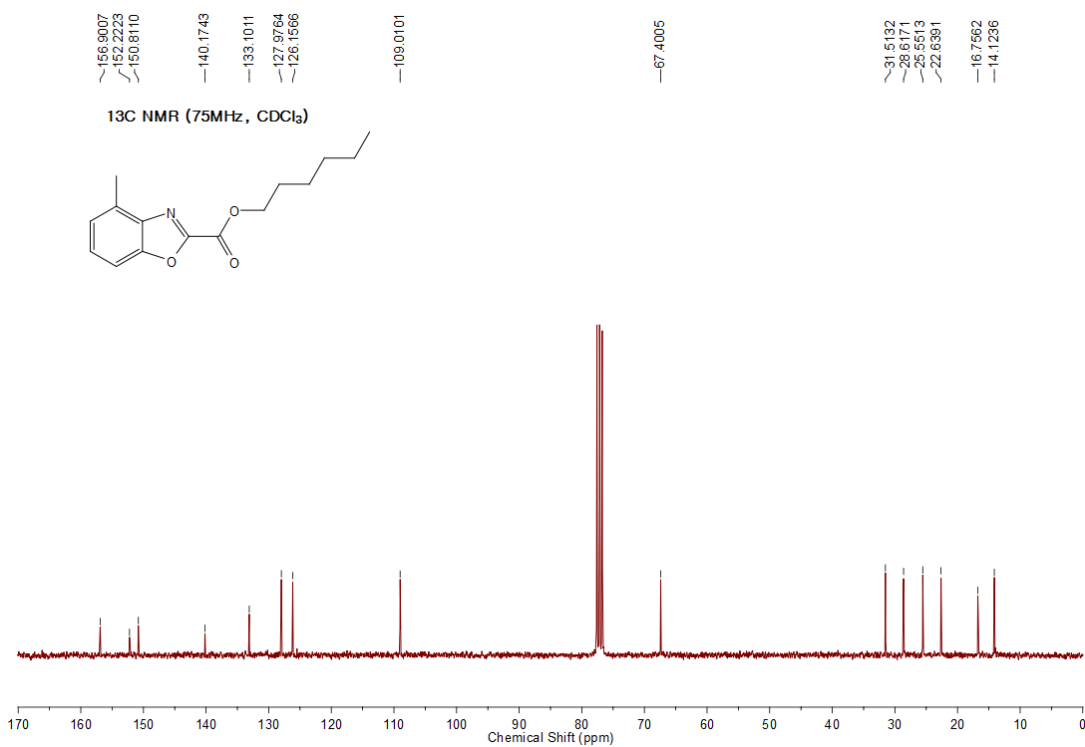



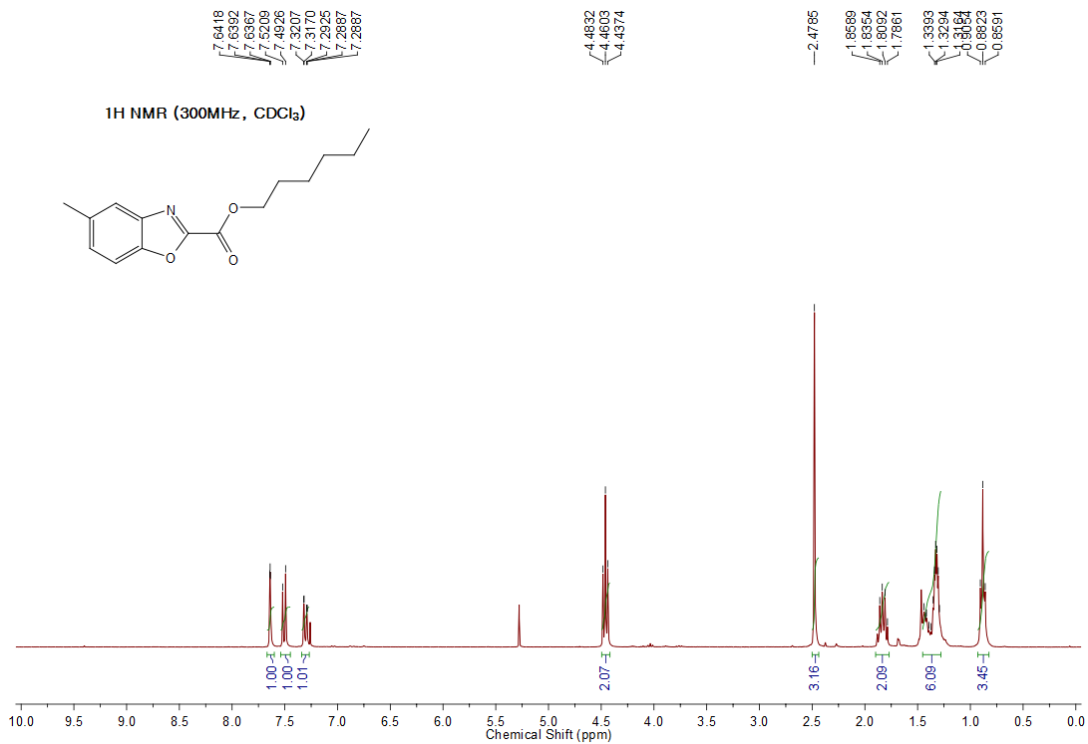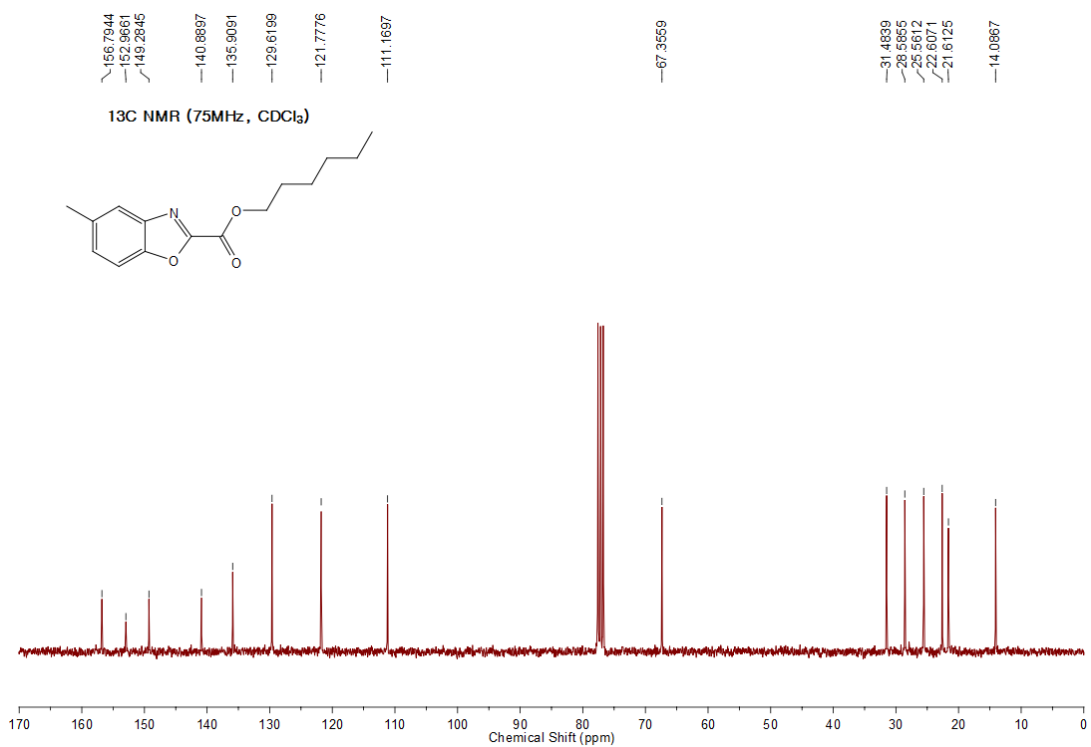

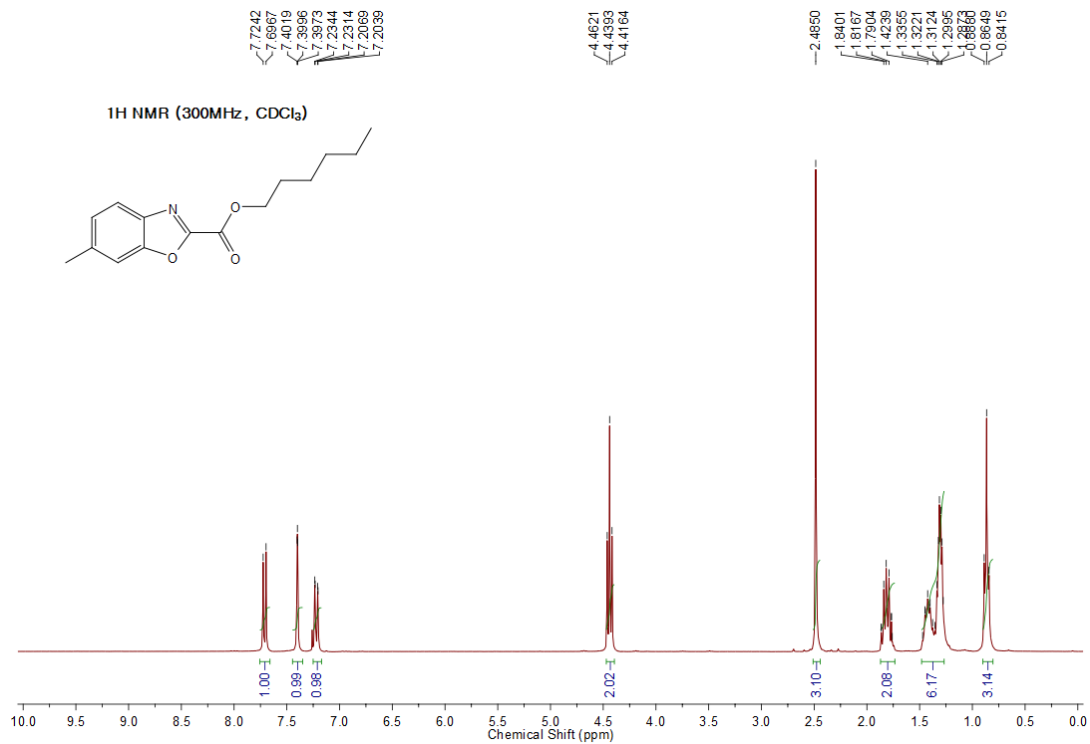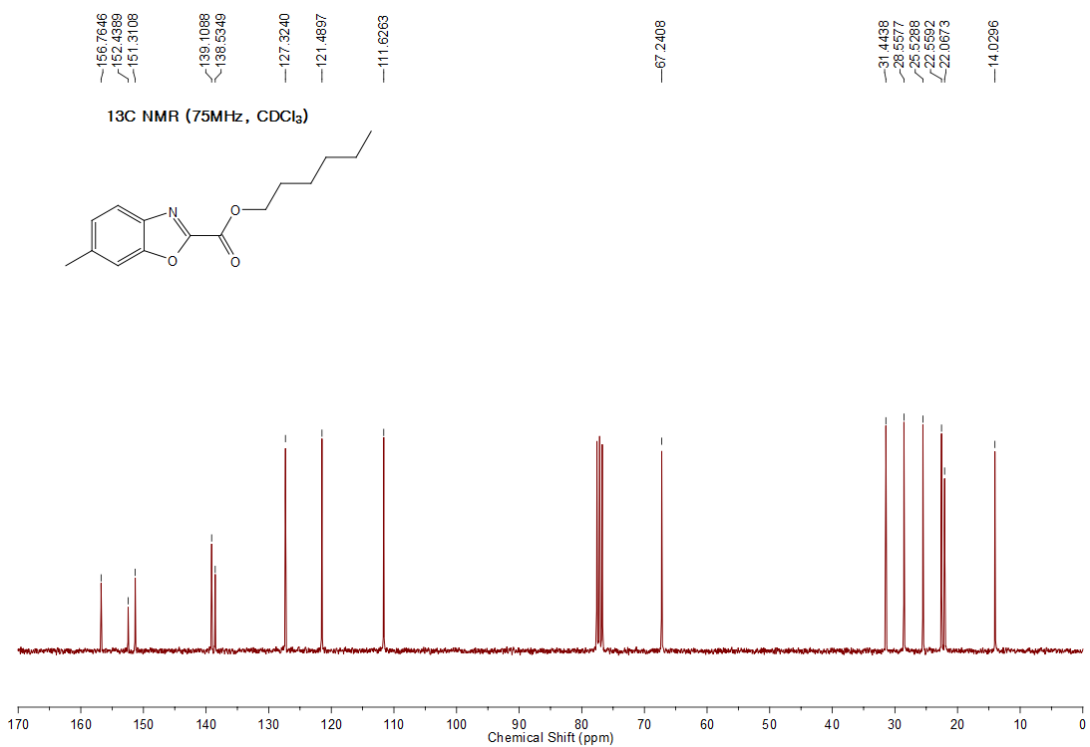

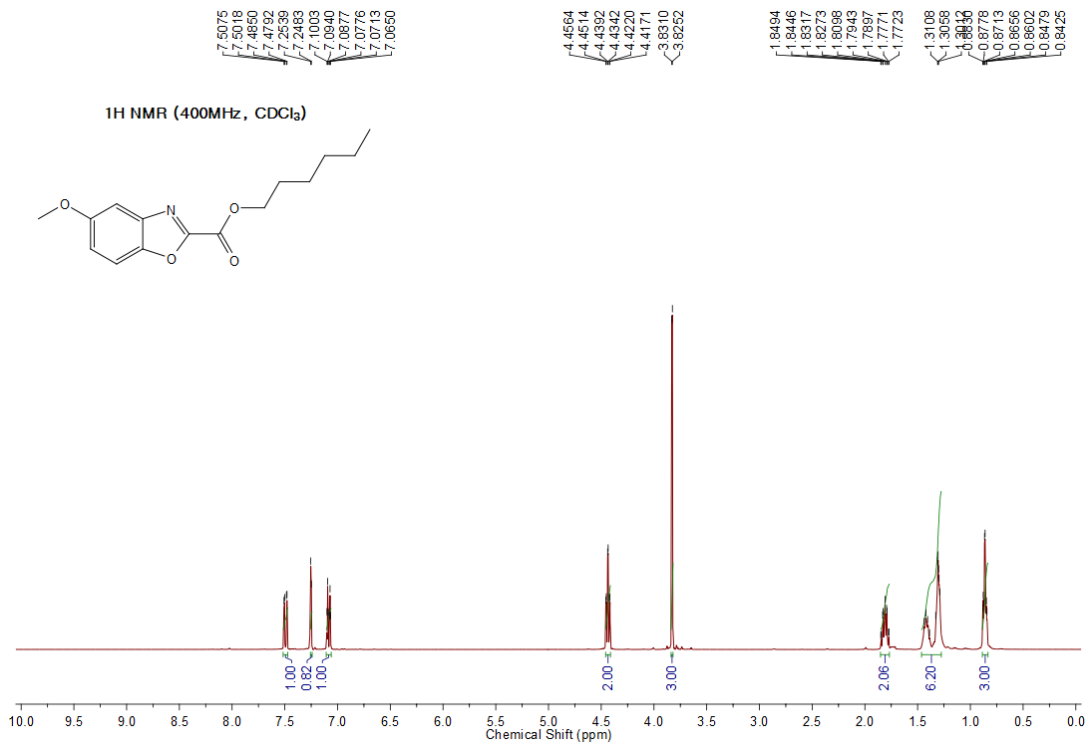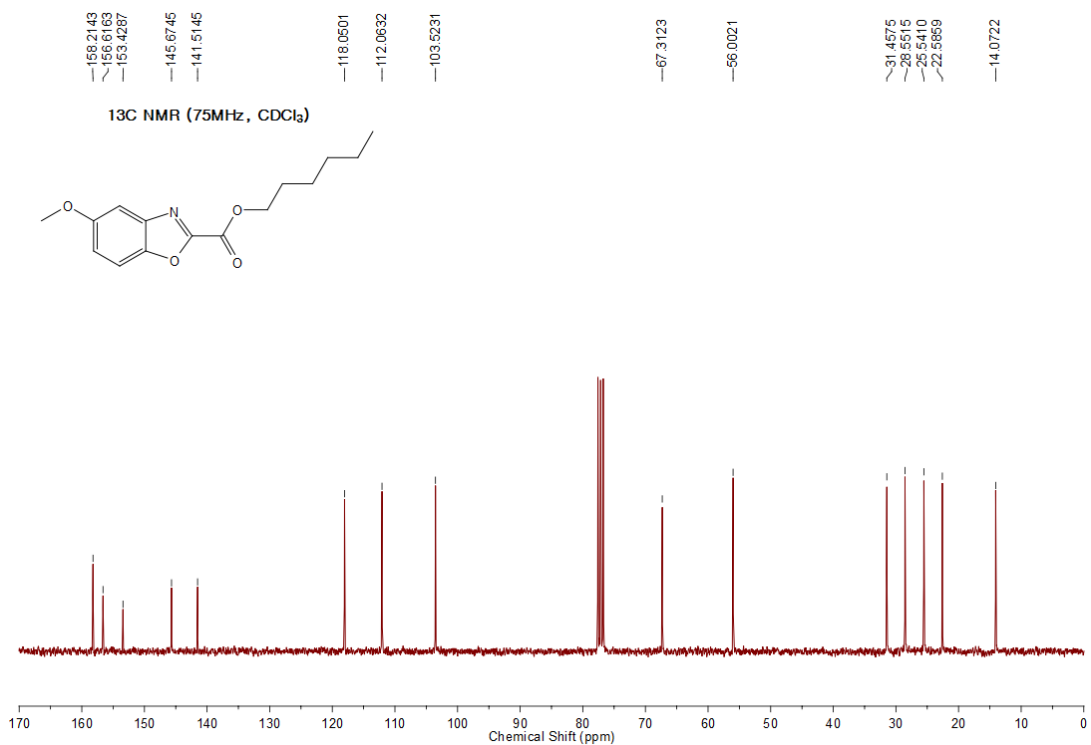

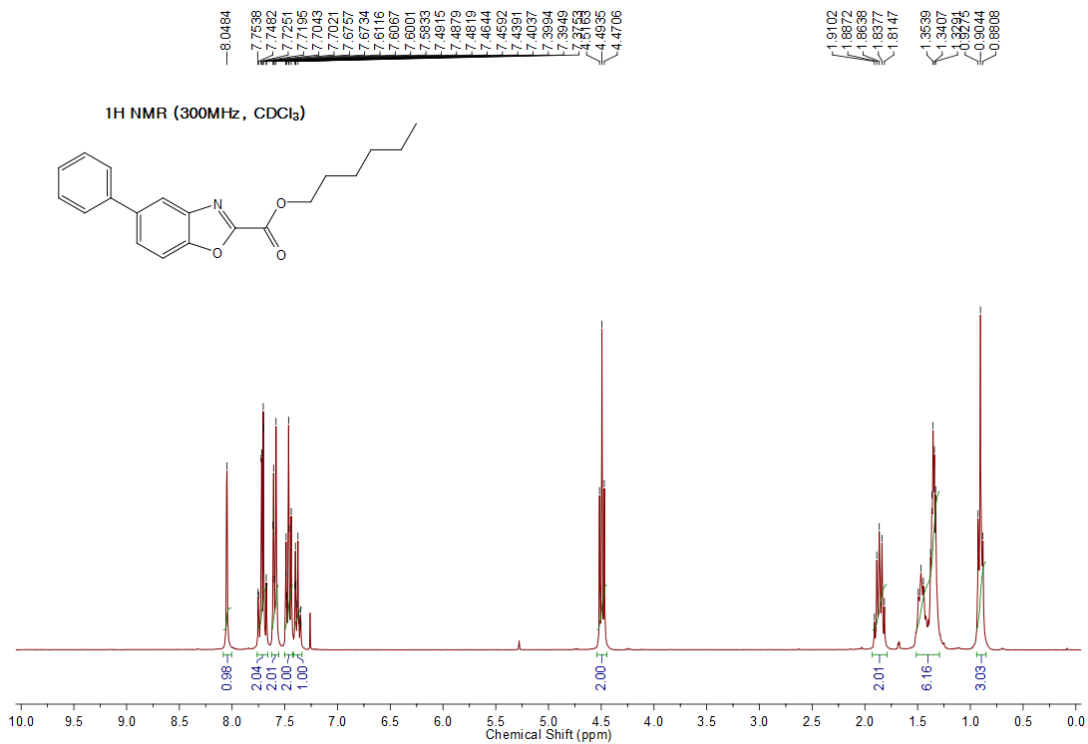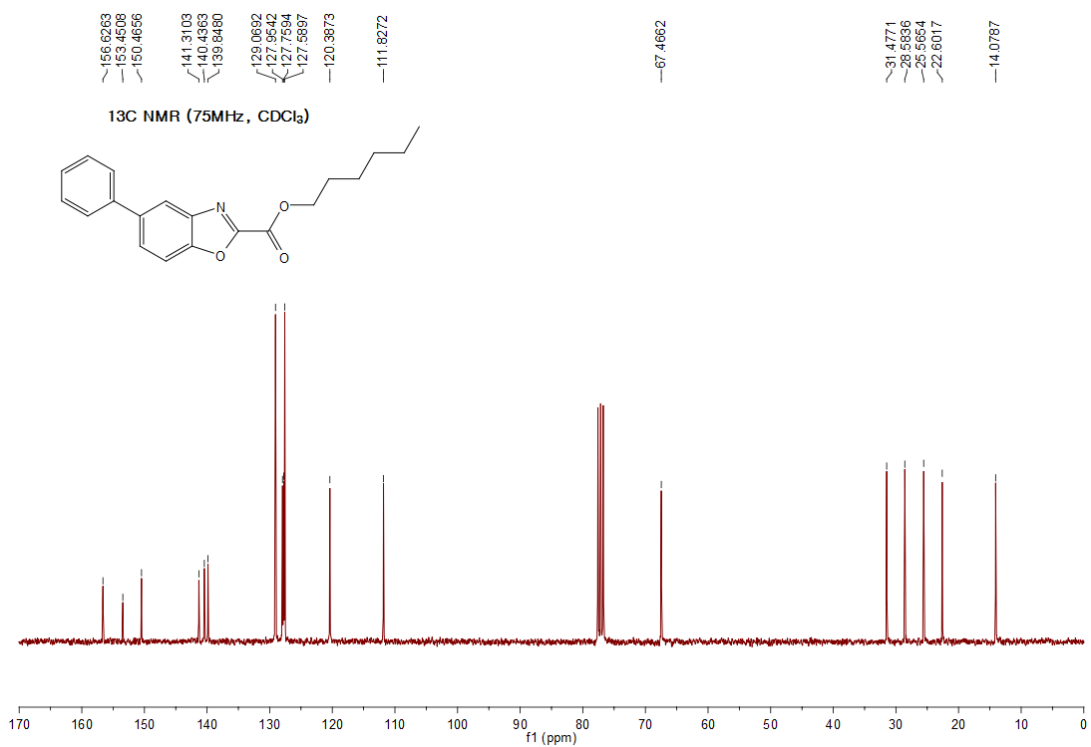

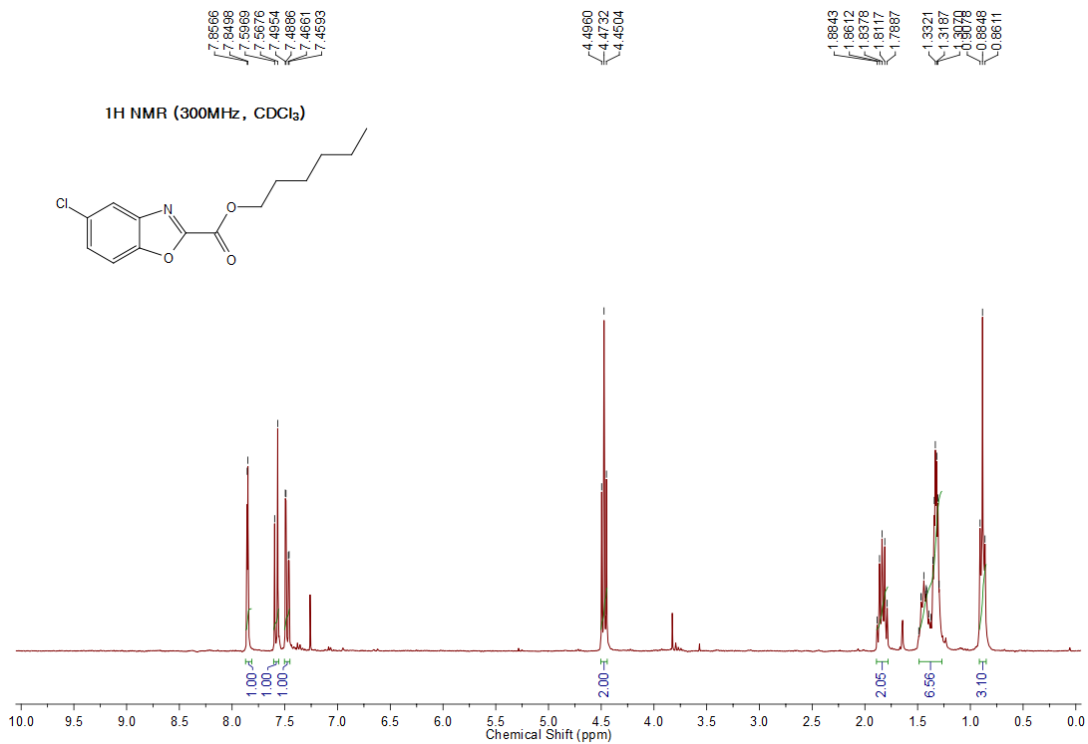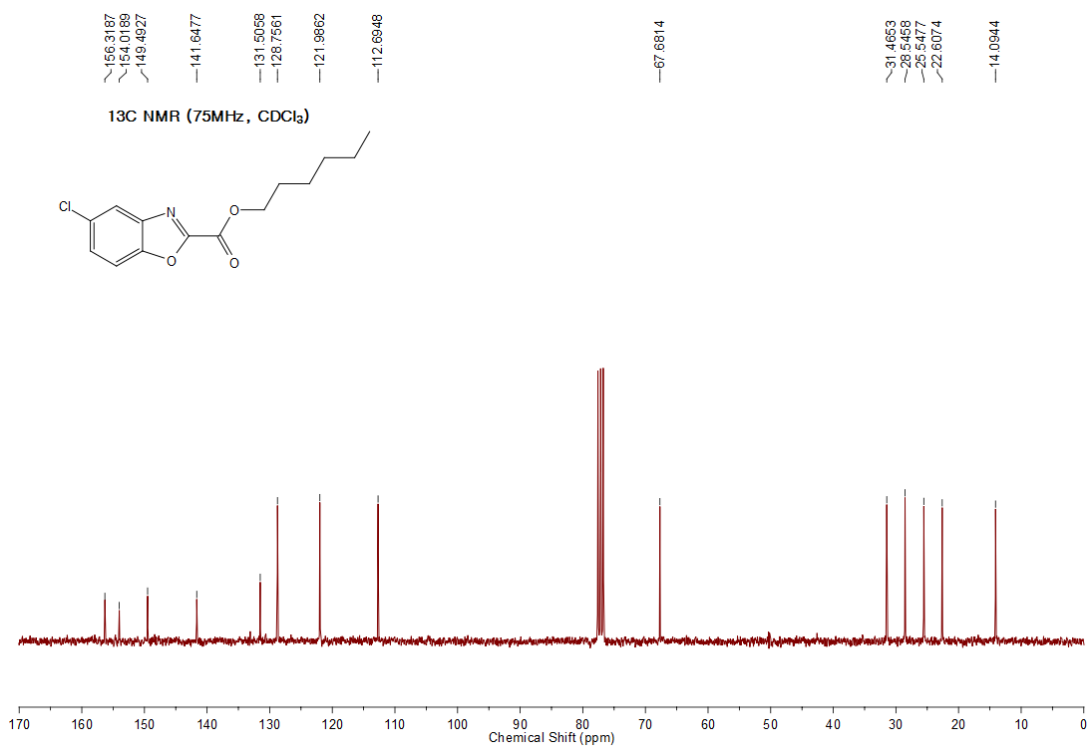

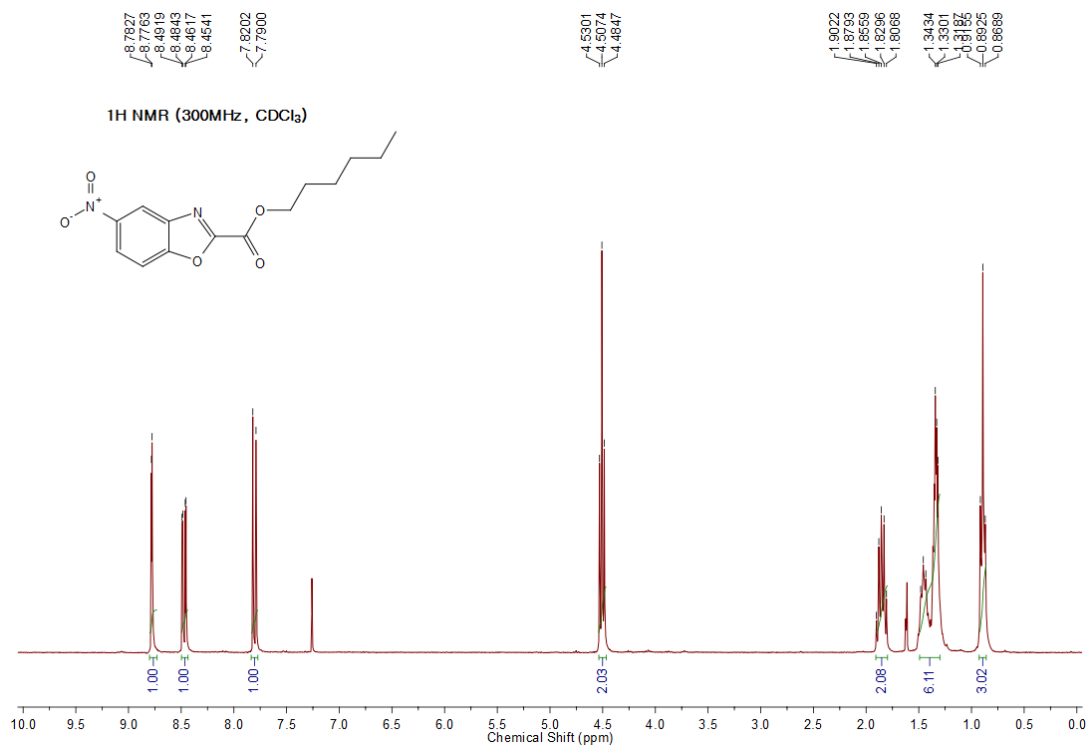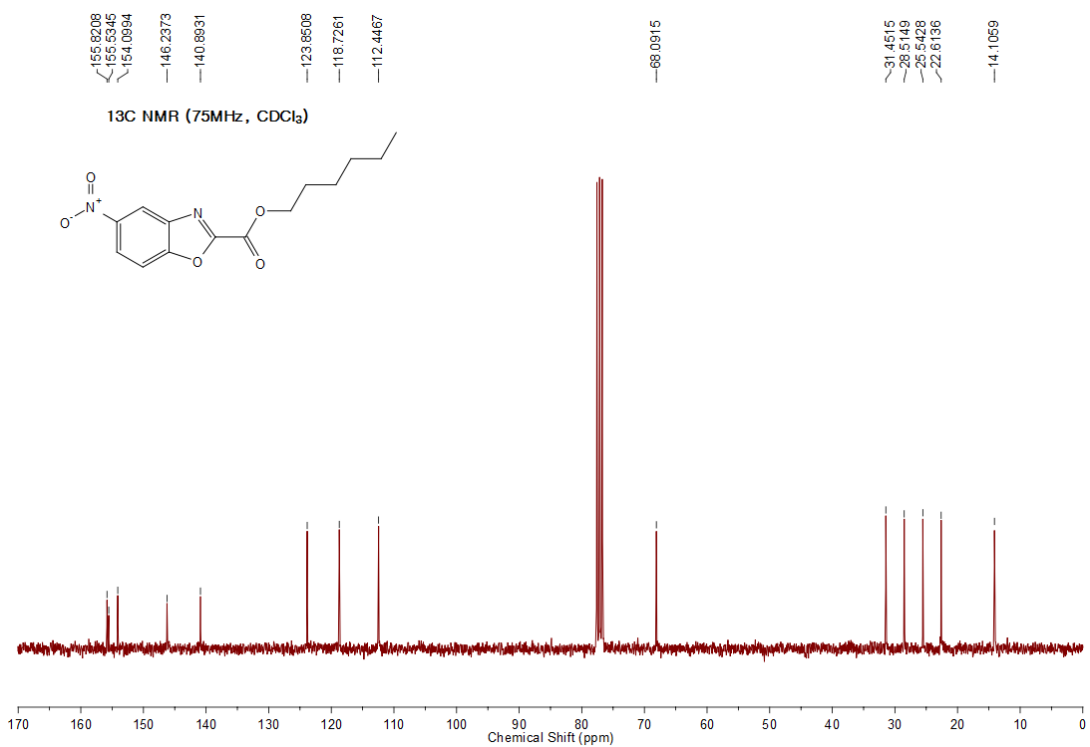

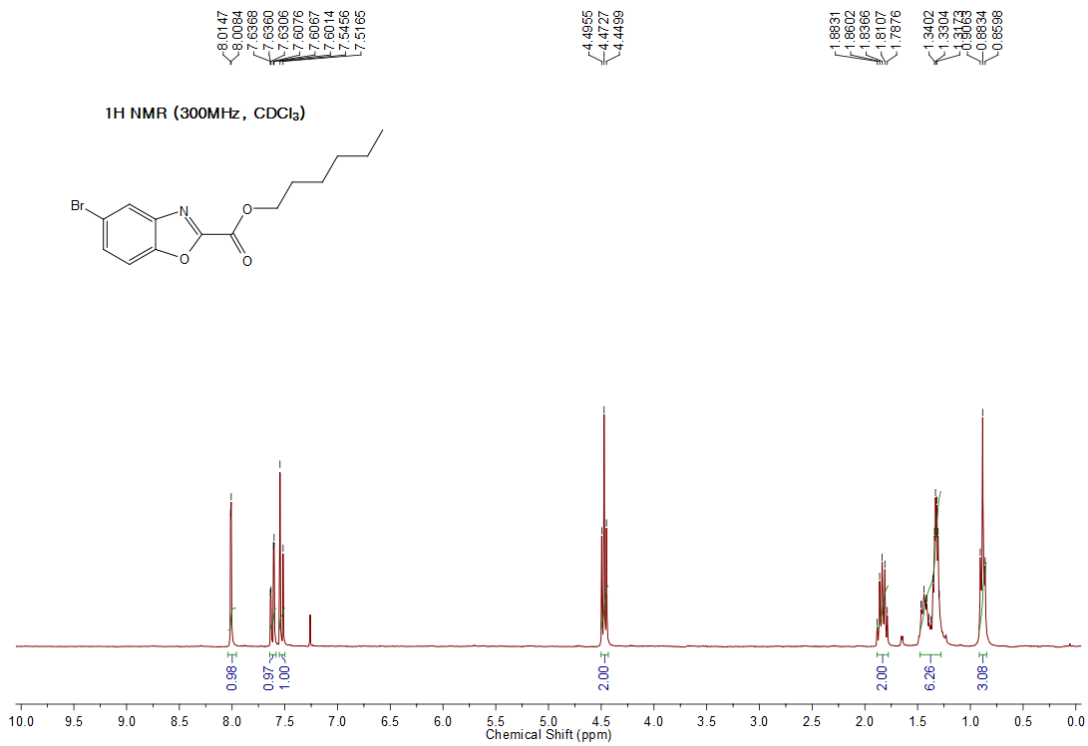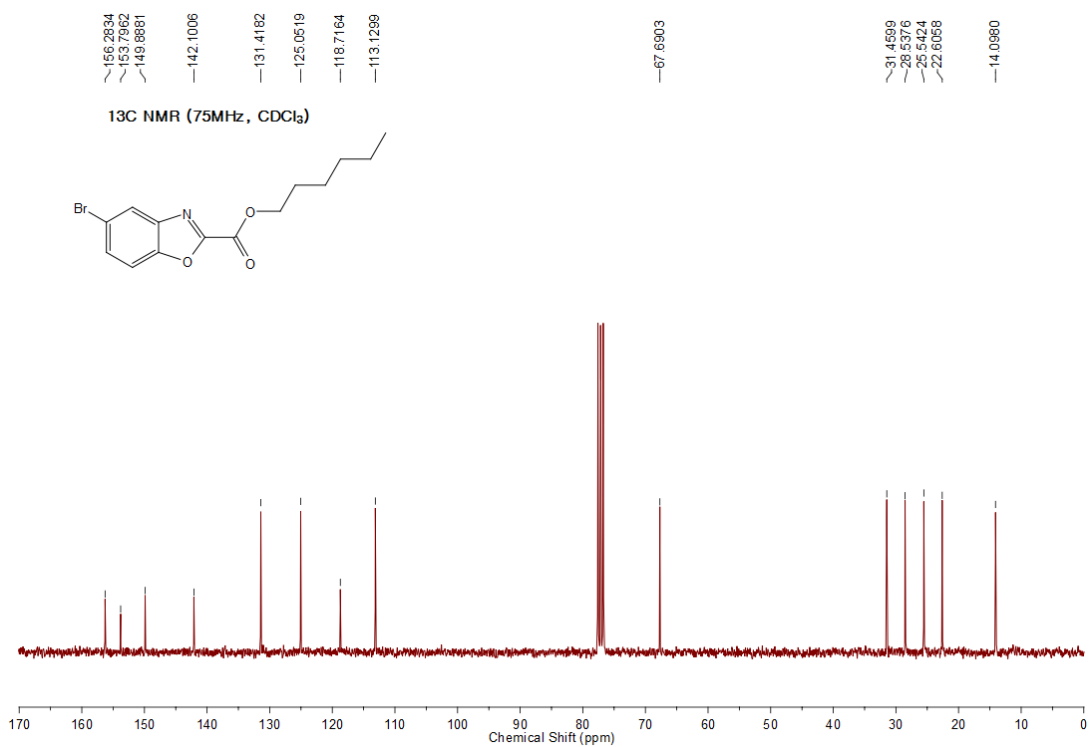

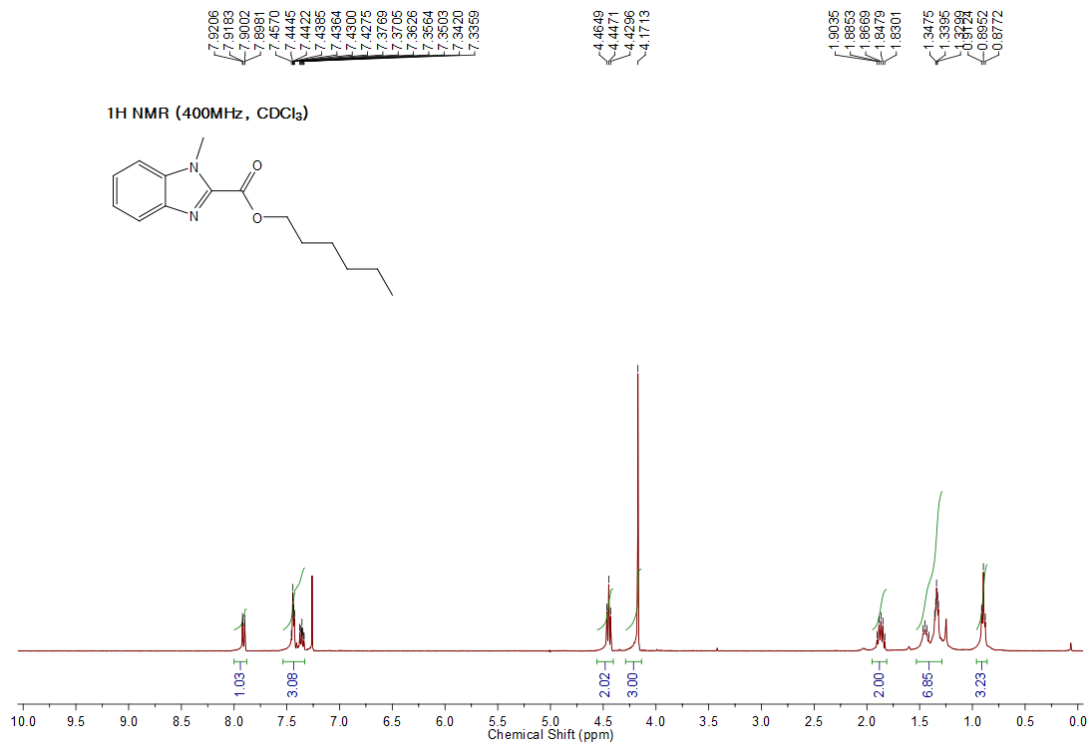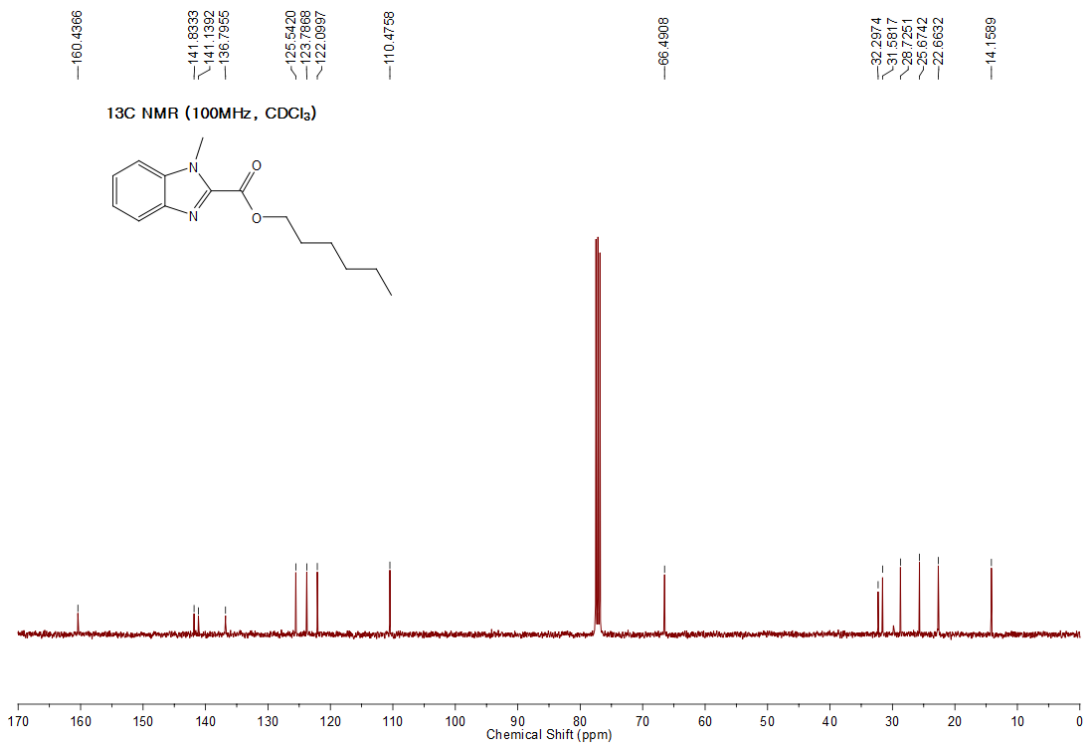



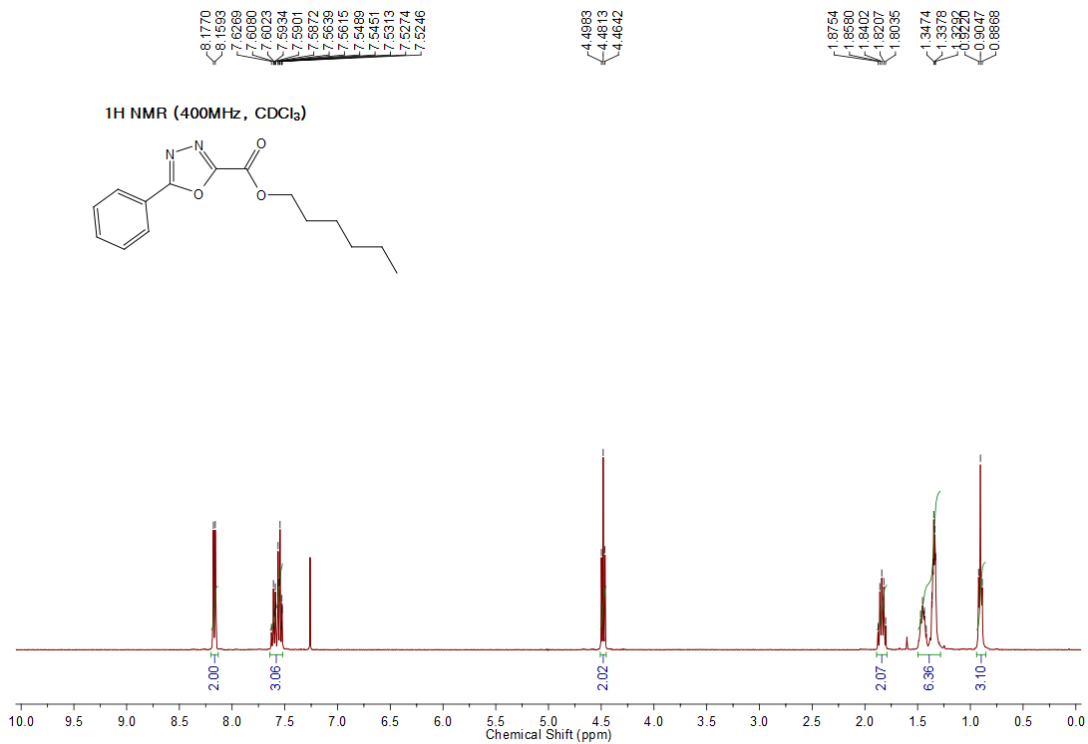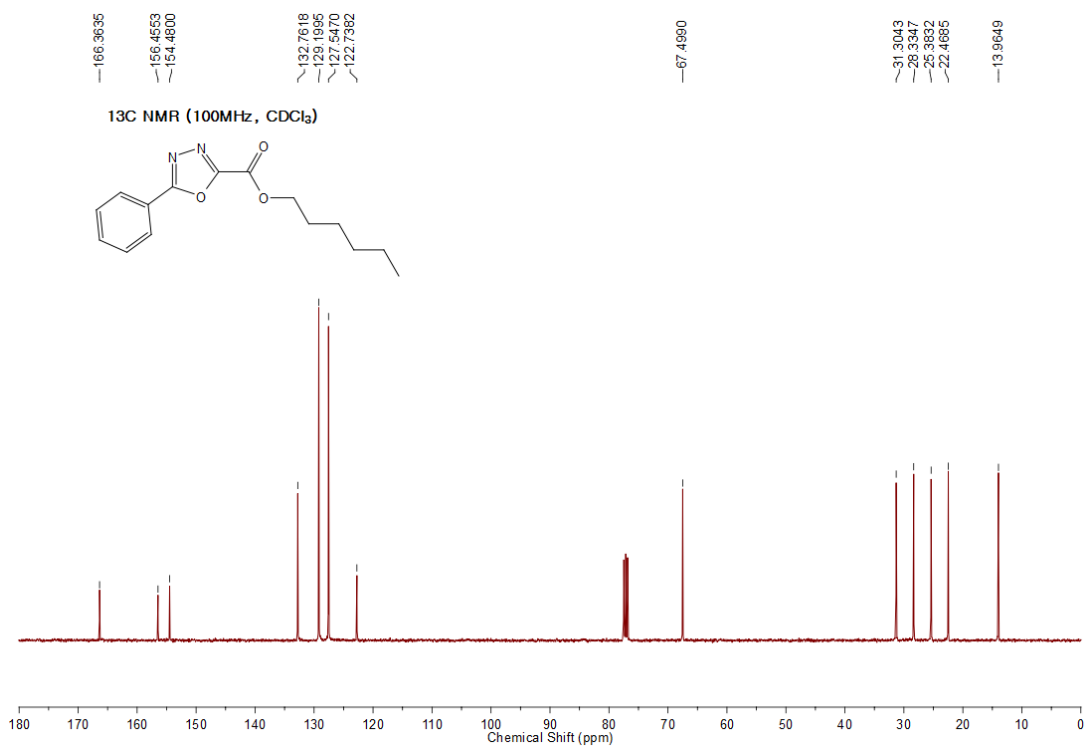

### 3. X-ray Crystallography data for **5a** and **5g**

Reflection data for **5a** and **5g** were collected on a Bruker APEX-II CCD-based diffractometer with graphite-monochromated MoK $\alpha$  radiation ( $\lambda = 0.7107 \text{ \AA}$ ). The hemisphere of reflection data were collected as  $\omega$  scan frames with  $0.5^\circ/\text{frame}$  and an exposure time of 10s/frame. Cell parameters were determined and refined by the SMART program. Data reduction was performed using SAINT software. The data were corrected for Lorentz and polarization effects. An empirical absorption correction was applied using the SADABS program. The structures of the compounds were solved by direct methods and refined by full matrix least-squares methods using the SHELXTL program package with anisotropic thermal parameters for all non-hydrogen atoms.

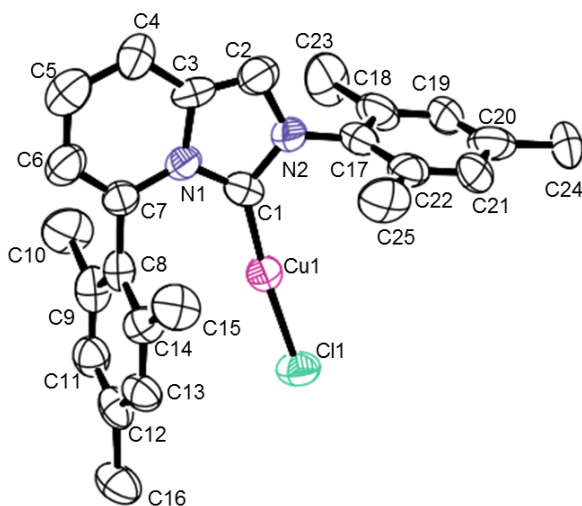

**Table S2.** Crystallographic data and parameters for **5a**

|                     |                                                    |
|---------------------|----------------------------------------------------|
| Identification code | <b>5a</b>                                          |
| CCDC number         | 1576746                                            |
| Empirical formula   | C <sub>25</sub> H <sub>26</sub> ClCuN <sub>2</sub> |
| Formula weight      | 453.47                                             |
| Temperature         | 293(2) <i>T</i> (K)                                |
| Wavelength          | 0.71073                                            |
| Crystal system      | Triclinic                                          |

|                                                       |                                                               |                       |
|-------------------------------------------------------|---------------------------------------------------------------|-----------------------|
| Space group                                           | <i>P</i> -1                                                   |                       |
| Unit cell dimensions                                  | <i>a</i> = 9.9670(8) Å                                        | $\alpha$ = 89.092(6)° |
|                                                       | <i>b</i> = 18.1432(16) Å                                      | $\beta$ = 82.857(4)°  |
|                                                       | <i>c</i> = 20.1268(16) Å                                      | $\gamma$ = 74.117(4)° |
| Volume                                                | 3472.8(5) Å <sup>3</sup>                                      |                       |
| <i>Z</i>                                              | 6                                                             |                       |
| Density (calculated)                                  | 1.301 g cm <sup>-3</sup>                                      |                       |
| Absorption coefficient                                | 1.071                                                         |                       |
| F(000)                                                | 1416                                                          |                       |
| $\theta$ range for data collection                    | 1.167 to 25.636°                                              |                       |
| Index ranges                                          | -12 ≤ <i>h</i> ≤ 12, -21 ≤ <i>k</i> ≤ 21, -24 ≤ <i>l</i> ≤ 24 |                       |
| Reflections collected                                 | 17569                                                         |                       |
| Independent reflections                               | 4739 [R(int) = 0.0279]                                        |                       |
| Completeness to $\theta$ = 25.636°                    | 95.2%                                                         |                       |
| Data / restraints / parameters                        | 12486/6/1604                                                  |                       |
| Goodness-of-fit on F <sup>2</sup>                     | 1.068                                                         |                       |
| Final R indices [ <i>I</i> > 2 $\sigma$ ( <i>I</i> )] | R1 = 0.0636, wR2 = 0.0872[3521]                               |                       |
| R indices (all data)                                  | R1 = 0.1252, wR2 = 0.1021                                     |                       |
| Largest diff. peak and hole                           | 0.260 and -0.297 e·Å <sup>-3</sup>                            |                       |

**Table S3.** Bond Lengths [Å] and Angle [°] for **5a**

---

|         |          |
|---------|----------|
| Cu1-Cl1 | 2.122(1) |
| Cu1-C1  | 1.886(4) |
| N1-C1   | 1.359(5) |
| N1-C3   | 1.411(6) |
| N1-C7   | 1.397(5) |
| N2-C1   | 1.371(5) |
| N2-C2   | 1.384(6) |
| N2-C17  | 1.439(5) |
| C2-C3   | 1.346(6) |
| C3-C4   | 1.428(7) |
| C4-C5   | 1.343(8) |
| C5-C6   | 1.426(7) |
| C6-C7   | 1.344(7) |
| C7-C8   | 1.486(7) |
| C8-C9   | 1.408(5) |
| C8-C13  | 1.412(6) |
| C9-C10  | 1.389(7) |
| C9-C14  | 1.501(5) |
| C10-C11 | 1.385(6) |
| C11-C12 | 1.370(6) |
| C11-C15 | 1.512(8) |
| C12-C13 | 1.383(7) |
| C13-C16 | 1.520(5) |
| C17-C18 | 1.384(5) |
| C17-C22 | 1.391(6) |
| C18-C19 | 1.377(7) |
| C19-C20 | 1.379(6) |
| C20-C21 | 1.380(5) |
| C21-C22 | 1.384(7) |
| C22-O1  | 1.364(4) |
| C23-C24 | 1.499(6) |

|             |          |
|-------------|----------|
| C23-O1      | 1.441(5) |
| C24-O2      | 1.414(7) |
| C25-C26     | 1.50(2)  |
| C25-O2      | 1.415(6) |
| C26-O3      | 1.39(2)  |
| O3-C27      | 1.36(1)  |
| <br>        |          |
| Cu1-C1-N2   | 125.9(8) |
| N1-C1-N2    | 102.4(8) |
| C1-N2-C2    | 112.7(9) |
| C1-N2-C17   | 122.8(9) |
| C2-N2-C17   | 124.5(9) |
| N2-C2-C3    | 106(1)   |
| N2-C17-C22  | 119(1)   |
| N2-C17-C18  | 121(1)   |
| C22-C17-C18 | 120(1)   |
| C17-C22-C21 | 119(1)   |
| C17-C22-C25 | 122(1)   |
| C21-C22-C25 | 120(1)   |
| C22-C21-C20 | 118(1)   |
| N1-C7-C8    | 117.7(9) |
| N1-C7-C6    | 118(1)   |
| C8-C7-C6    | 124(1)   |
| C11-C9-C8   | 122(1)   |
| C11-C9-C10  | 120(1)   |
| C8-C9-C10   | 118(1)   |
| C9-C11-C12  | 119(1)   |
| C11-C12-C13 | 120(1)   |
| C11-C12-C16 | 121(1)   |
| C13-C12-C16 | 119(1)   |
| C12-C13-C14 | 122(1)   |
| C13-C14-C8  | 119(1)   |

|             |        |
|-------------|--------|
| C13-C14-C15 | 121(1) |
| C8-C14-C15  | 120(1) |
| C7-C8-C9    | 124(1) |
| C7-C8-C14   | 118(1) |
| C9-C8-C14   | 118(1) |
| C17-C18-C19 | 120(1) |
| C17-C18-C23 | 118(1) |
| C19-C18-C23 | 122(1) |
| C18-C19-C20 | 119(1) |
| N1-C3-C2    | 108(1) |
| N1-C3-C4    | 118(1) |
| C2-C3-C4    | 134(2) |
| C7-C6-C5    | 123(1) |
| C6-C5-C4    | 117(2) |
| C3-C4-C5    | 120(2) |
| C21-C20-C19 | 123(1) |
| C21-C20-C24 | 115(1) |
| C19-C20-C24 | 121(1) |

---

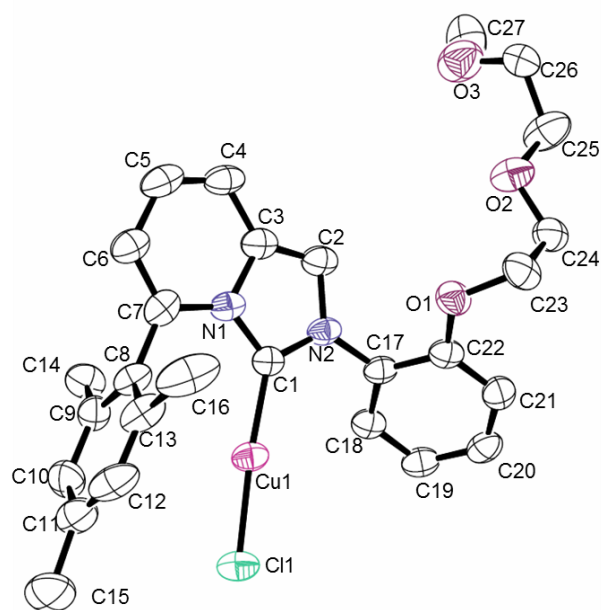

**Table S4.** Crystallographic data and parameters for **5g**

|                      |                                  |                              |
|----------------------|----------------------------------|------------------------------|
| Identification code  | <b>5g</b>                        |                              |
| CCDC number          | 1576622                          |                              |
| Empirical formula    | $C_{27.50}H_{32}ClCuN_2O_{3.50}$ |                              |
| Formula weight       | 545.54                           |                              |
| Temperature          | 296(2) <i>T</i> (K)              |                              |
| Wavelength           | 0.71073                          |                              |
| Crystal system       | Triclinic                        |                              |
| Space group          | <i>P</i> -1                      |                              |
| Unit cell dimensions | $a = 10.6797(2) \text{ \AA}$     | $\alpha = 99.8551(8)^\circ$  |
|                      | $b = 11.1444(2) \text{ \AA}$     | $\beta = 103.2083(8)^\circ$  |
|                      | $c = 13.1053(2) \text{ \AA}$     | $\gamma = 116.2178(7)^\circ$ |
| Volume               | $1294.49(4) \text{ \AA}^3$       |                              |
| <i>Z</i>             | 2                                |                              |

|                                         |                                                                        |
|-----------------------------------------|------------------------------------------------------------------------|
| Density (calculated)                    | 1.400 g cm <sup>-3</sup>                                               |
| Absorption coefficient                  | 0.981                                                                  |
| F(000)                                  | 570                                                                    |
| $\theta$ range for data collection      | 2.144 to 25.376°.                                                      |
| Index ranges                            | -12 $\leq$ h $\leq$ 12, -13 $\leq$ k $\leq$ 13, -15 $\leq$ l $\leq$ 15 |
| Reflections collected                   | 17569                                                                  |
| Independent reflections                 | 4739 [R(int) = 0.0279]                                                 |
| Completeness to $\theta = 25.376^\circ$ | 99.9%                                                                  |
| Data / restraints / parameters          | 4739/4/359                                                             |
| Goodness-of-fit on F2                   | 0.997                                                                  |
| Final R indices [I > 2 $\sigma$ ( I)]   | R1 = 0.0481, wR2 =<br>0.1226[3521]                                     |
| R indices (all data)                    | R1 = 0.0689, wR2 = 0.1329                                              |
| Largest diff. peak and hole             | 0.836 and -0.422 e $\cdot$ Å <sup>-3</sup>                             |

**Table S5.** Bond Lengths [Å] and Angle [°] for **5g**

|         |          |
|---------|----------|
| Cu1-C11 | 2.135(5) |
| Cu1-C1  | 1.83(1)  |
| N1-C1   | 1.38(1)  |
| N1-C7   | 1.39(1)  |
| N1-C3   | 1.43(2)  |
| C1-N2   | 1.39(1)  |
| N2-C2   | 1.40(2)  |
| N2-C17  | 1.42(1)  |
| C2-C3   | 1.31(2)  |
| C17-C22 | 1.39(2)  |



|            |          |
|------------|----------|
| C17-C18    | 1.40(1)  |
| C22-C21    | 1.40(2)  |
| C22-C25    | 1.52(2)  |
| C21-C20    | 1.37(2)  |
| C7-C8      | 1.47(1)  |
| C7-C6      | 1.35(2)  |
| C9-C11     | 1.39(2)  |
| C9-C8      | 1.38(2)  |
| C9-C10     | 1.60(2)  |
| C11-C12    | 1.38(2)  |
| C12-C13    | 1.38(2)  |
| C12-C16    | 1.56(2)  |
| C13-C14    | 1.38(2)  |
| C14-C8     | 1.44(1)  |
| C14-C15    | 1.53(2)  |
| C18-C19    | 1.34(2)  |
| C18-C23    | 1.55(2)  |
| C19-C20    | 1.38(2)  |
| C3-C4      | 1.41(3)  |
| C6-C5      | 1.45(3)  |
| C5-C4      | 1.46(4)  |
| C20-C24    | 1.57(2)  |
|            |          |
| Cl1-Cu1-C1 | 173.5(1) |
| C1-N1-C3   | 111.2(3) |
| C1-N1-C7   | 126.8(3) |
| C3-N1-C7   | 122.1(3) |
| C1-N2-C2   | 112.1(3) |
| C1-N2-C17  | 122.7(3) |
| C2-N2-C17  | 125.1(3) |
| Cu1-C1-N1  | 129.4(3) |
| Cu1-C1-N2  | 127.0(3) |

|             |          |
|-------------|----------|
| N1-C1-N2    | 103.5(3) |
| N2-C2-C3    | 106.6(4) |
| N1-C3-C2    | 106.6(3) |
| N1-C3-C4    | 118.3(3) |
| C2-C3-C4    | 135.1    |
| C3-C4-C5    | 118.9(4) |
| C4-C5-C6    | 121.2(4) |
| C5-C6-C7    | 121.9(4) |
| N1-C7-C6    | 117.7(4) |
| N1-C7-C8    | 116.7(3) |
| C6-C7-C8    | 125.7(4) |
| C7-C8-C9    | 120.0(4) |
| C7-C8-C13   | 120.7(4) |
| C9-C8-C13   | 119.3(4) |
| C8-C9-C10   | 118.6(4) |
| C8-C9-C14   | 121.1(4) |
| C10-C9-C14  | 120.3(4) |
| C9-C10-C11  | 122.3(4) |
| C10-C11-C12 | 118.3(4) |
| C10-C11-C15 | 121.1(4) |
| C12-C11-C15 | 120.6(5) |
| C11-C12-C13 | 122.1(5) |
| C8-C13-C12  | 119.3(4) |
| C8-C13-C16  | 119.4(4) |
| C12-C13-C16 | 121.2(4) |
| N2-C17-C18  | 119.8(3) |
| N2-C17-C22  | 119.3(3) |
| C18-C17-C22 | 120.8(4) |
| C17-C18-C19 | 119.9(4) |
| C18-C19-C20 | 119.4(4) |
| C19-C20-C21 | 121.2(4) |
| C20-C21-C22 | 119.7(4) |

|             |          |
|-------------|----------|
| C17-C22-C21 | 119.0(4) |
| C17-C22-O1  | 115.9(3) |
| C21-C22-O1  | 125.1(4) |
| C24-C23-O1  | 112.8(3) |
| C23-C24-O2  | 108.3(3) |
| C26-C25-O2  | 109.7(6) |
| C25-C26-O3  | 105.7(9) |
| C26-O3-C27  | 112(1)   |
| C22-O1-C23  | 119.5(3) |
| C24-O2-C25  | 110.7(4) |

---
